# Supplementary material for: Variable reproducibility in genome-scale public data: A case study using ENCODE ChIP sequencing resource
Source: PubMed Central journal article supplement (PMC4686001; doi:10.1016/j.febslet.2015.11.027), 2015-12-21

**ENCODE SPP peaks**

■ Peak detected  
□ No peak detected

**ENCODE peakSeq peaks**

■ Peak detected  
□ No peak detected

**SPP peak comparison with MAnorm**

■ p-value >  $10^{-2}$   
 ■ p-value  $\leq 10^{-2}$   
 ■ p-value  $\leq 10^{-3}$   
 □ p-value  $\leq 10^{-5}$

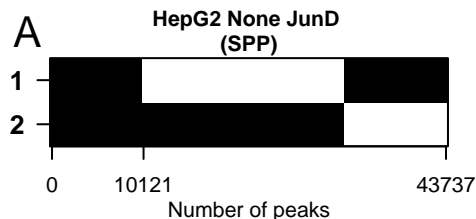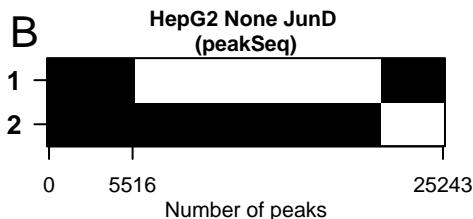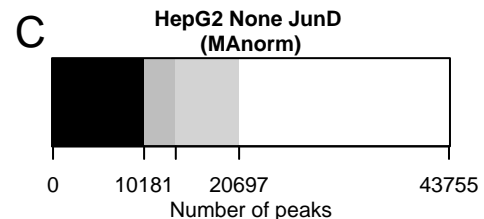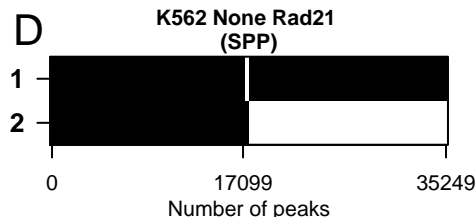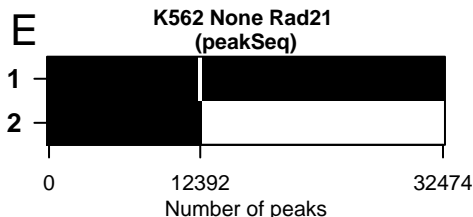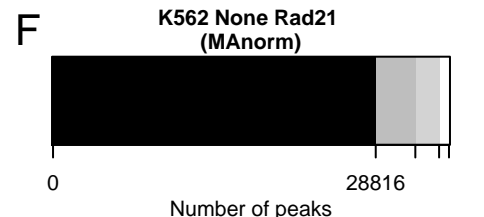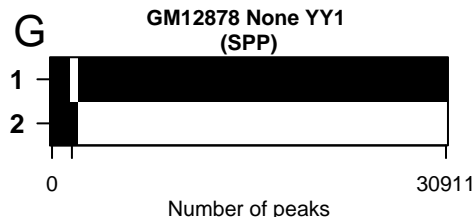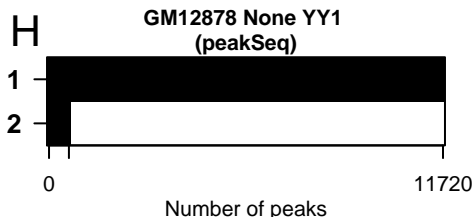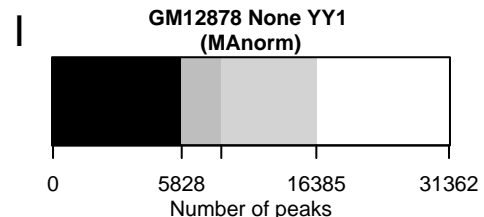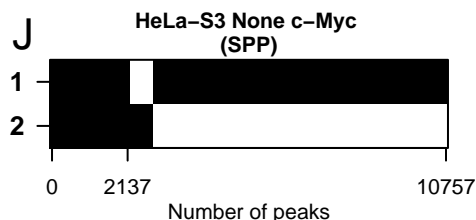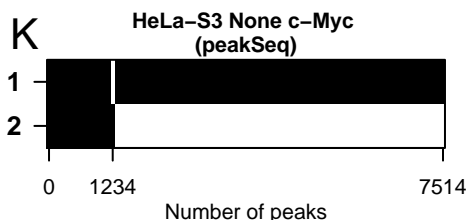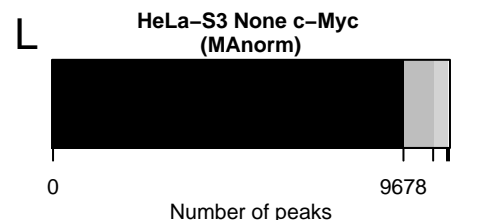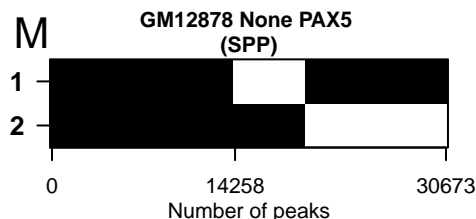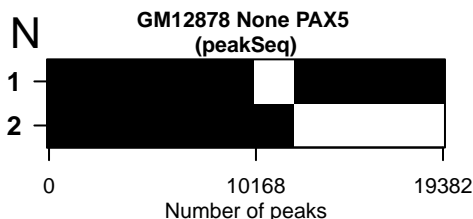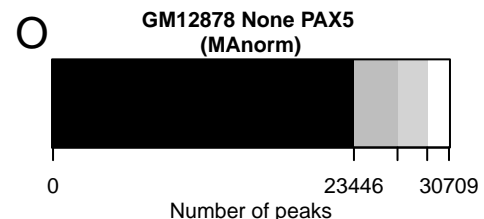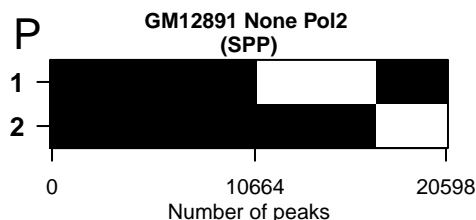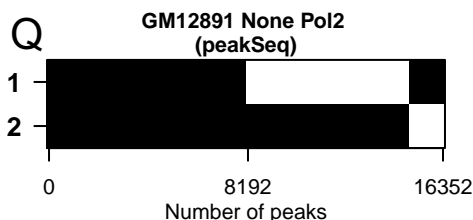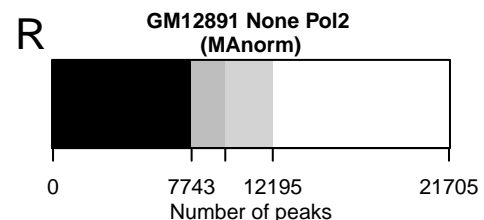

Supplementary figure 1: ENCODE SPP peaks, ENCODE peakSeq peaks, and MAnorm SPP peaks comparison.

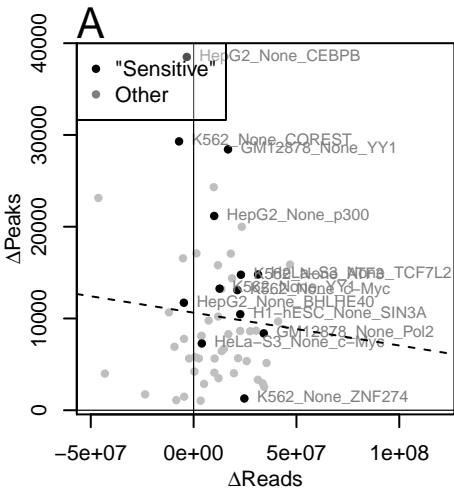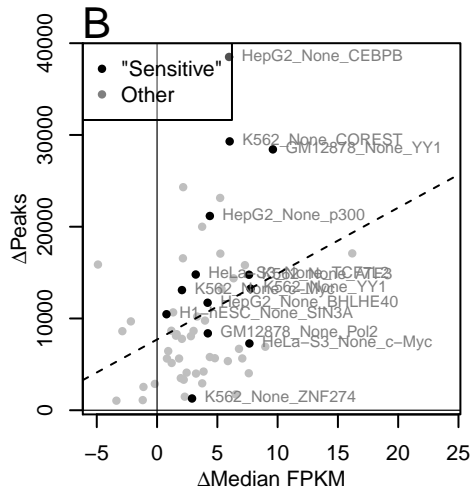

Supplementary figure 2: Influence of sequencing depth and common peaks height on the number of peaks detected

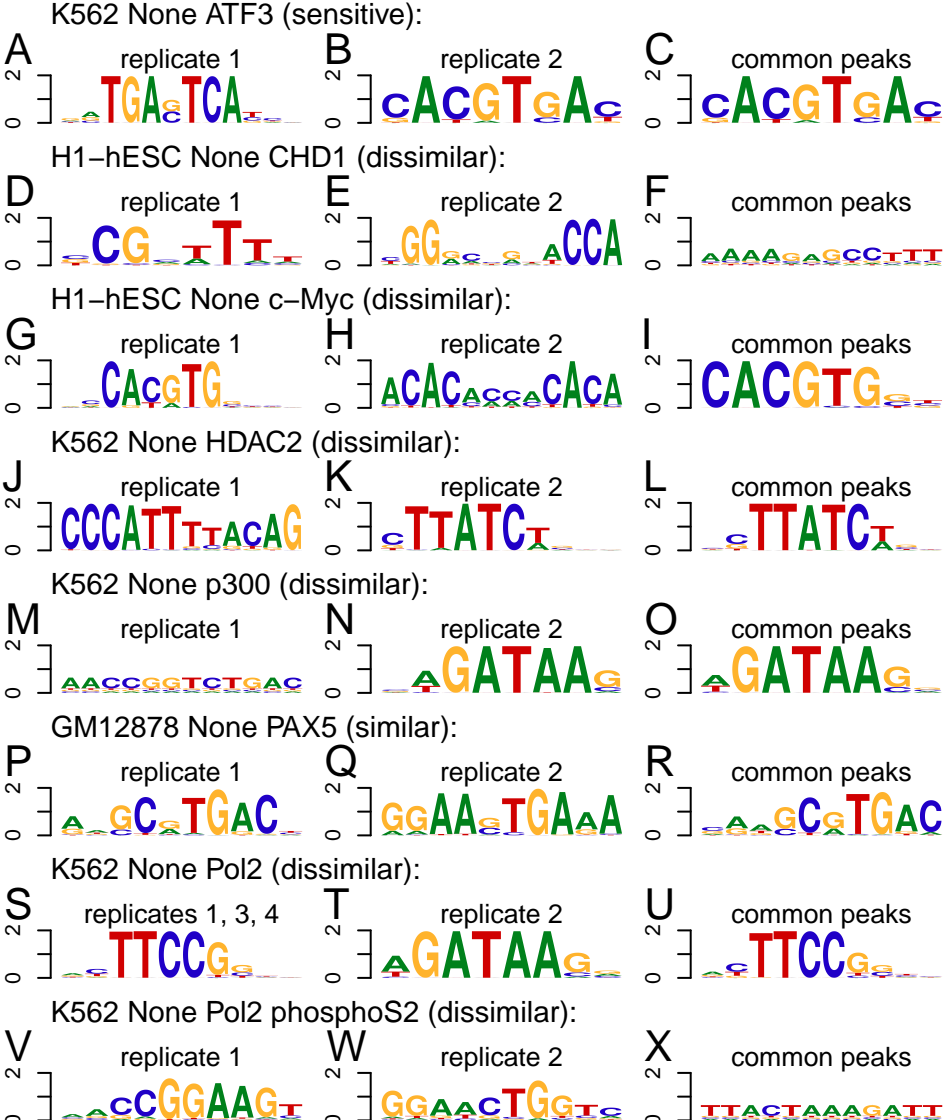

Supplementary figure 3: Differences in de novo motif discovery from different replicate experiments of 8 experimental conditions.

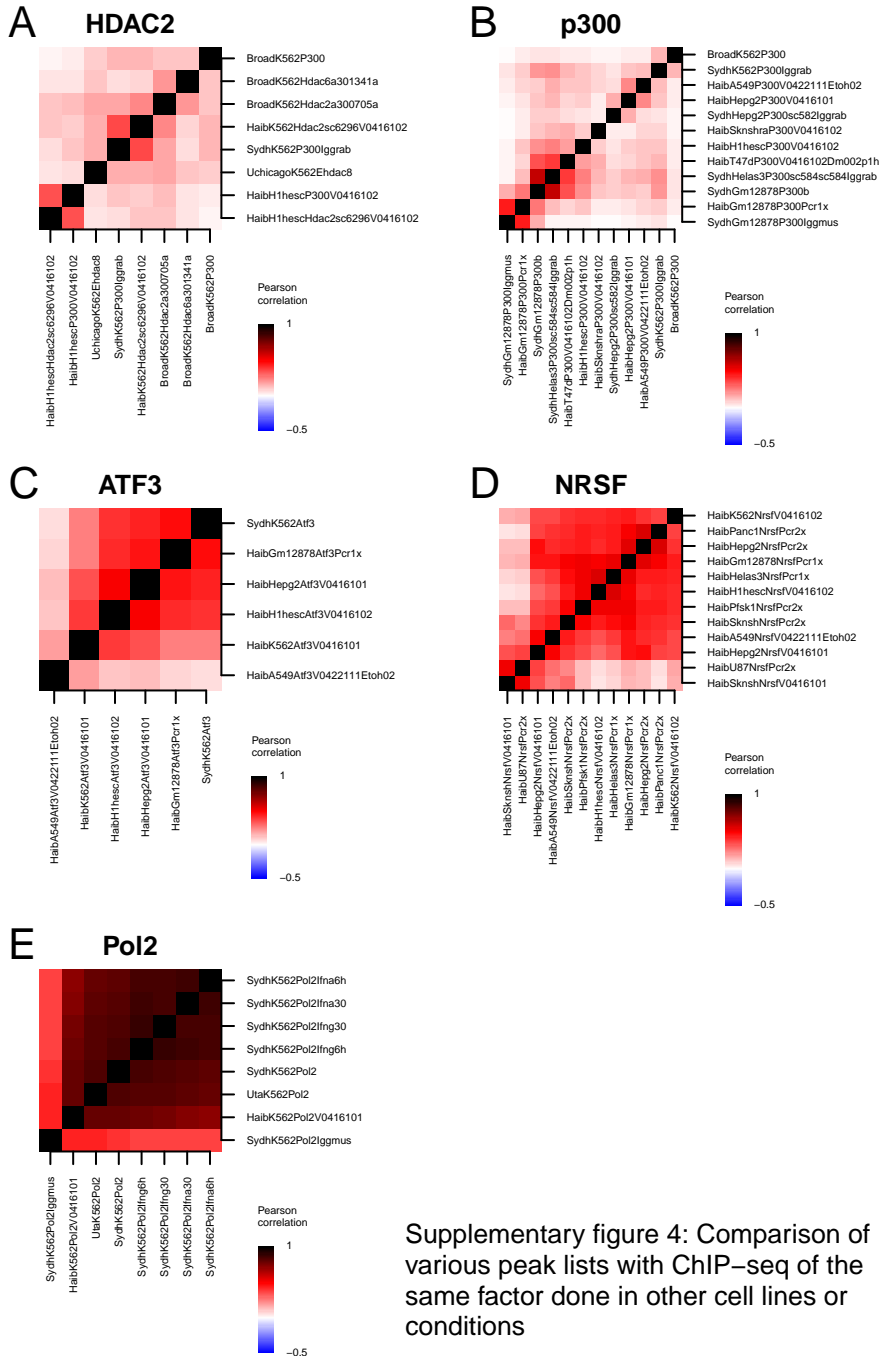

A

## K562 None ATF3 (sensitive)

1 – HaibK562Atf3V0416101UniPk  
2 – SydhK562Atf3UniPk

Peak detected ■  
No peak detected □

C

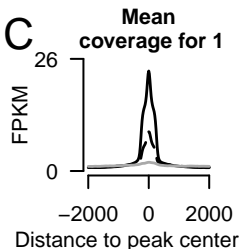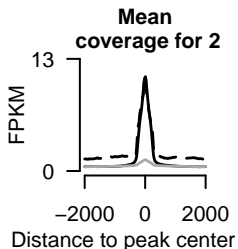

Mean coverage at:

- Common peaks
- - Sample specific peaks
- Undetected peaks

D

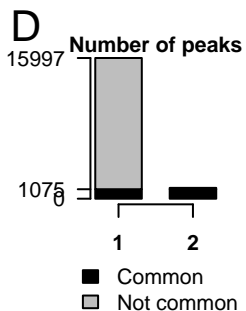

E

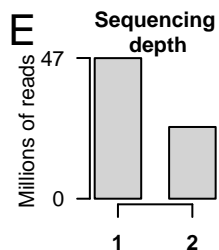

F

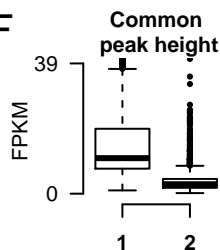

G

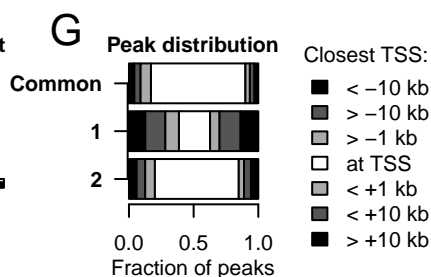

B

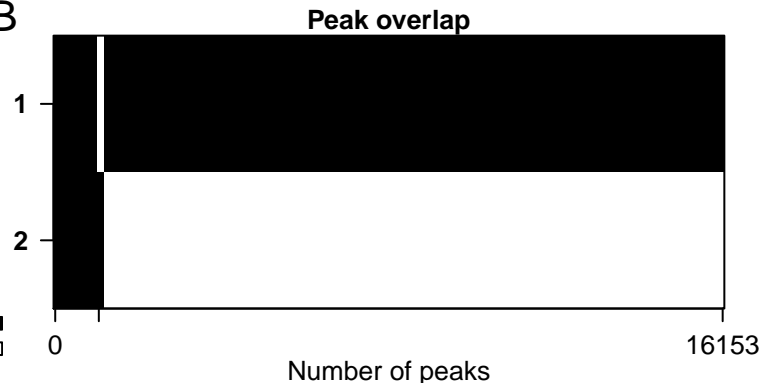

# A HepG2 None BHLHE40 (sensitive)

1 – HaibHepg2Bhlhe40V0416101UniPk  
2 – SydhHepg2Bhlhe40clggrabUniPk

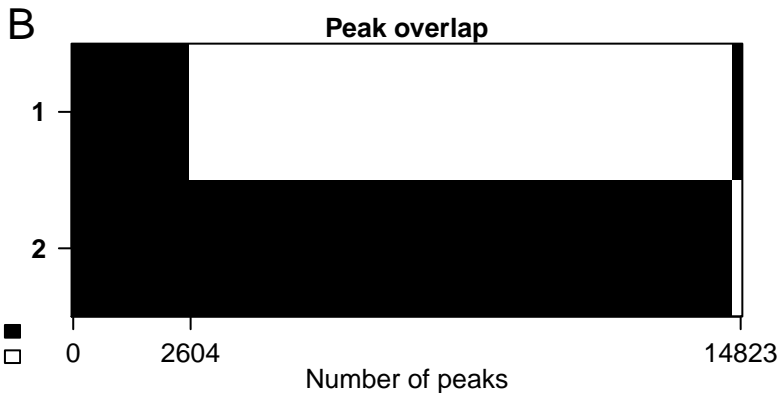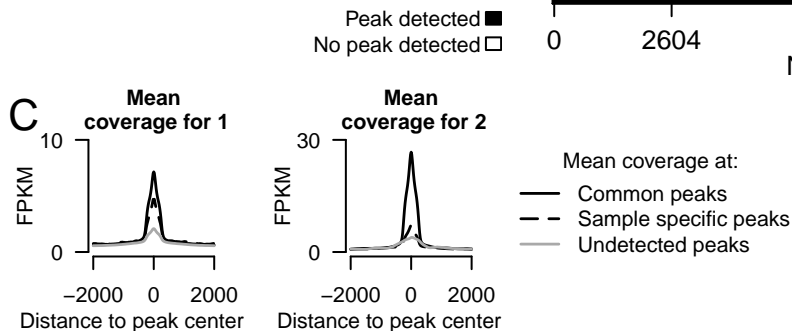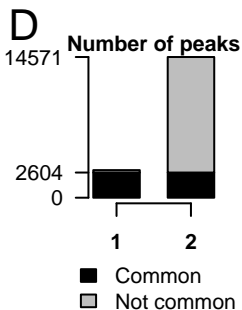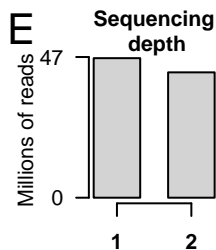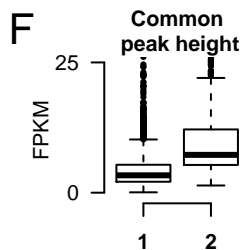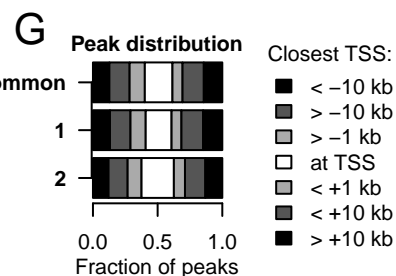

Supplementary figure 6: HepG2 None BHLHE40 (sensitive)

A

## HepG2 None CEBPB (sensitive)

1 – HaibHepg2Cebpbbsc150V0416101UniPk  
2 – SydhHepg2CebpbblggrabUniPk

Peak detected ■  
No peak detected □

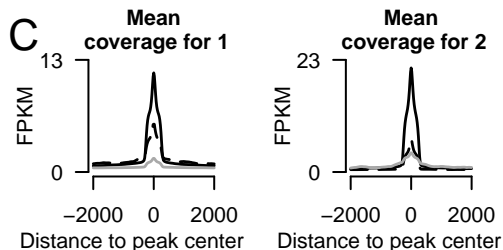

D

### Number of peaks

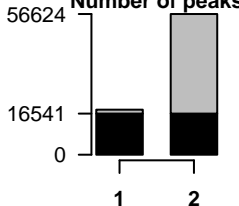

■ Common  
■ Not common

E

### Sequencing depth

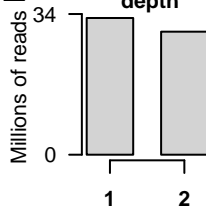

B

### Peak overlap

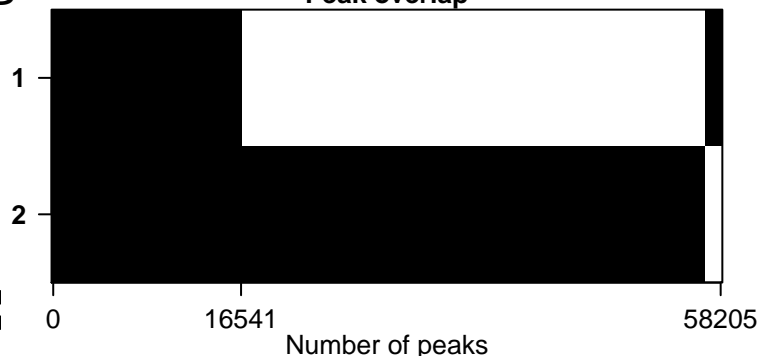

F

### Common peak height

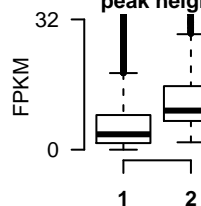

G

### Peak distribution

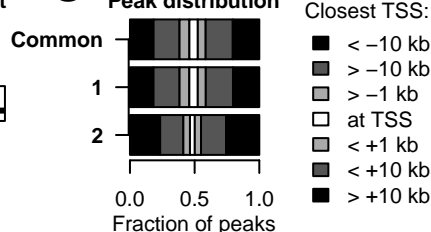

A

## K562 None CEBPB (dissimilar)

1 – HaibK562Cebpbsc150V0422111UniPk  
2 – SydhK562CebpblggrabUniPk

Peak detected ■  
No peak detected □

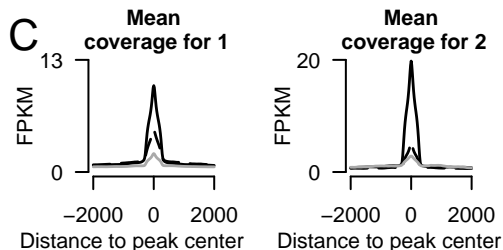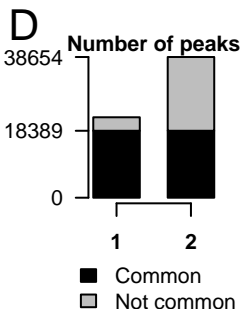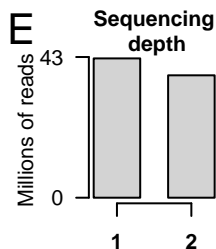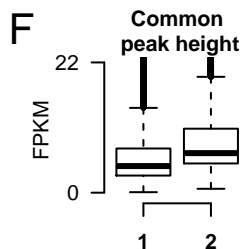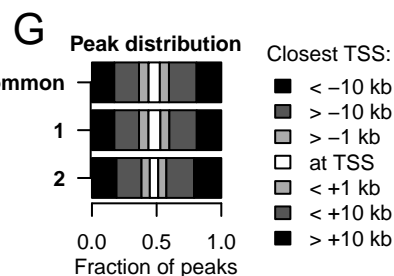

B

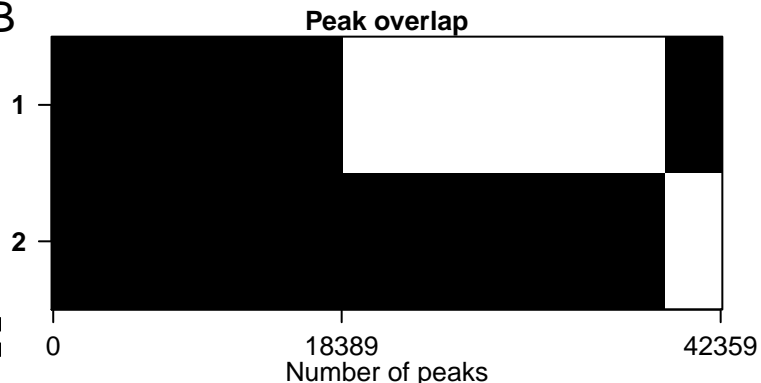

Supplementary figure 8: K562 None CEBPB (dissimilar)



# A H1-hESC None CHD1 (dissimilar)

1 – BroadH1hesChd1a301218aUniPk  
2 – SydhH1hesChd1a301218algrabUniPk

Peak detected ■  
No peak detected □

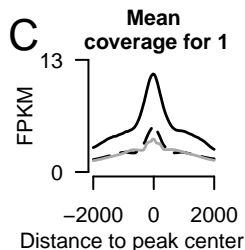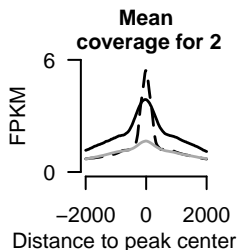

Mean coverage at:  
— Common peaks  
- - Sample specific peaks  
... Undetected peaks

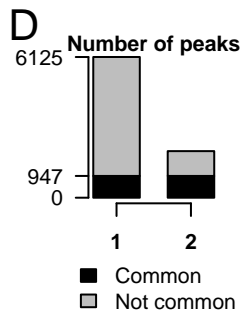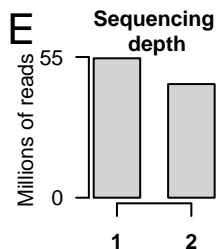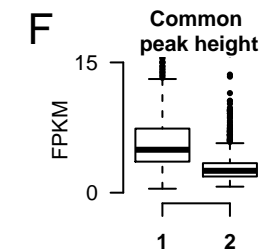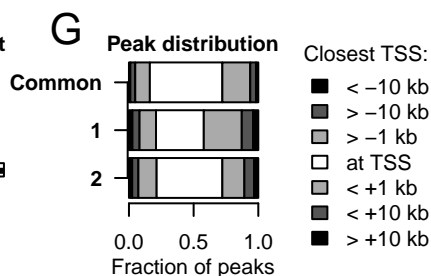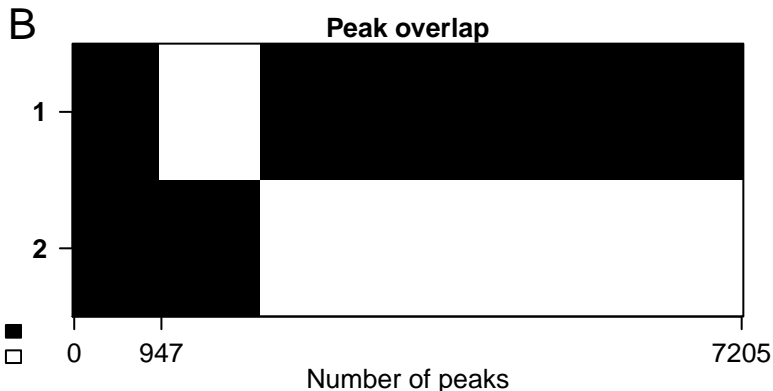

Supplementary figure 9: H1-hESC None CHD1 (dissimilar)

A

# H1-hESC None c-Myc (dissimilar)

1 - SydhH1hesccMyclggrabUniPk  
2 - UtaH1hesccMycUniPk

Peak detected ■  
No peak detected □

B

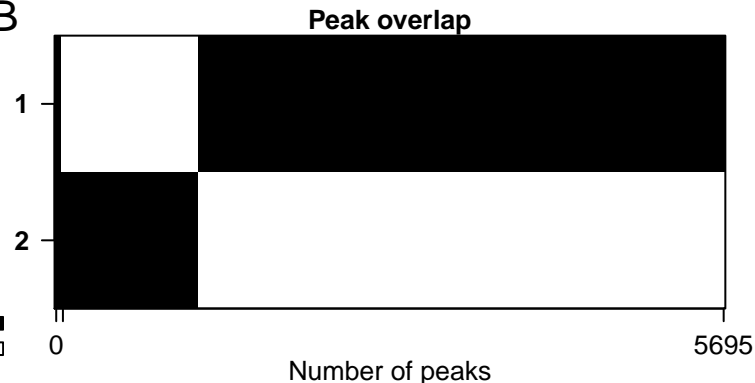

C

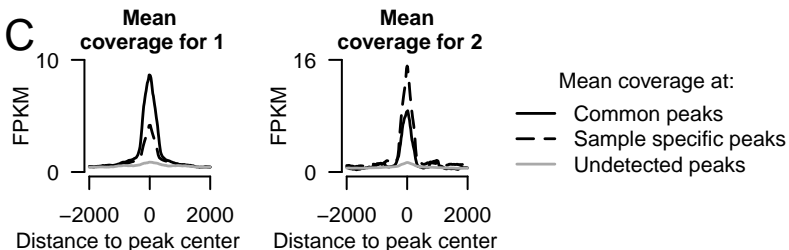

D

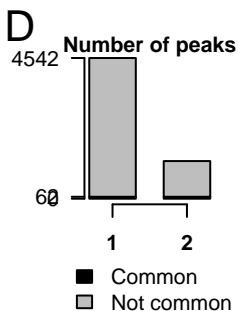

E

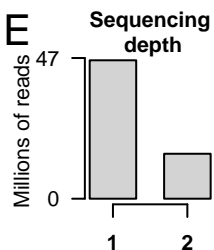

F

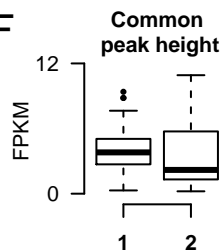

G

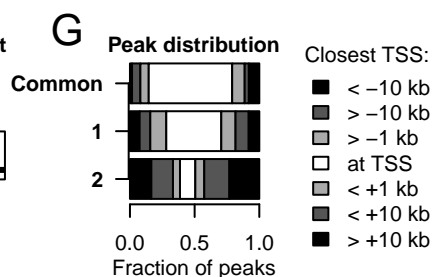

A

# HeLa-S3 None c-Myc (sensitive)

1 - SydhHelas3CmycUniPk  
2 - UtaHelas3CmycUniPk

Peak detected ■  
No peak detected □

B

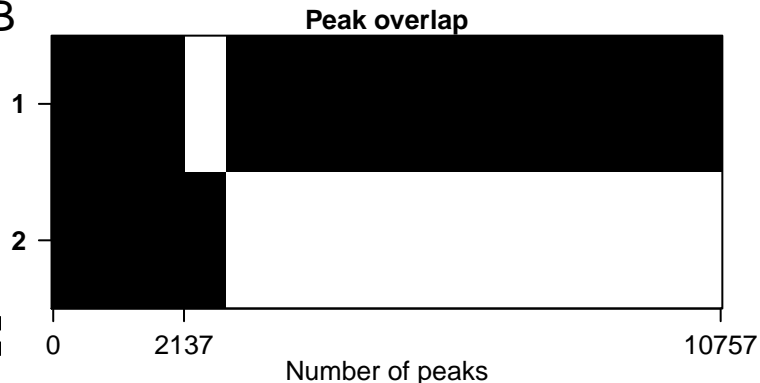

C

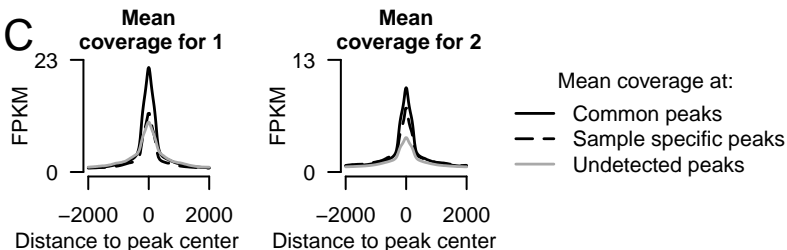

D

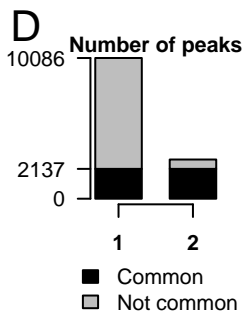

E

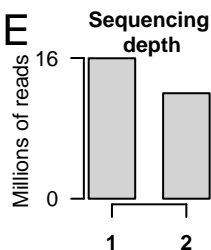

F

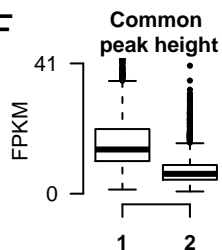

G

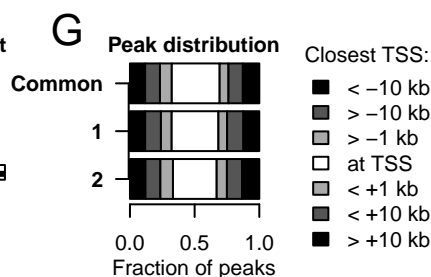

A

## K562 None c-Myc (sensitive)

- 1 - SydhK562CmycIgrabUniPk  
2 - SydhK562CmycUniPk  
3 - UtaK562CmycUniPk

Peak detected ■  
No peak detected □

C

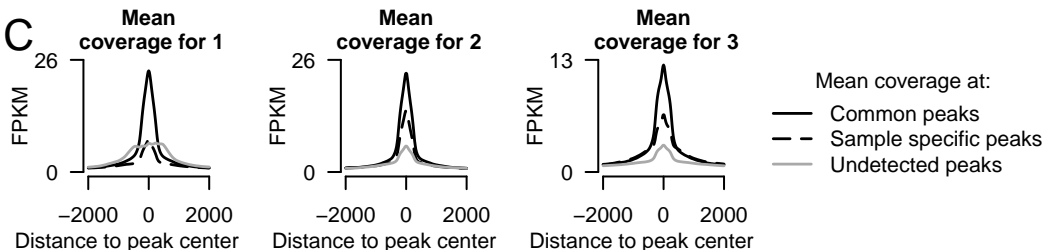

D

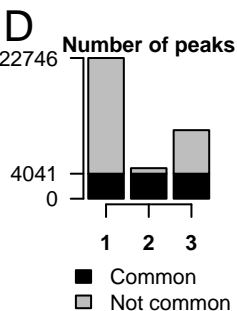

E

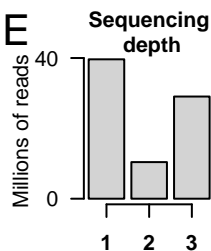

F

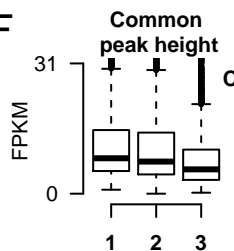

G

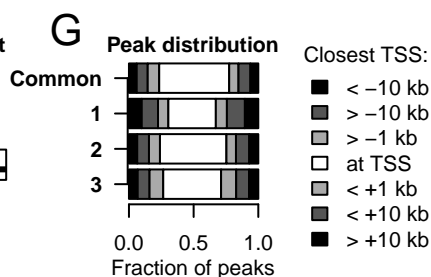

B

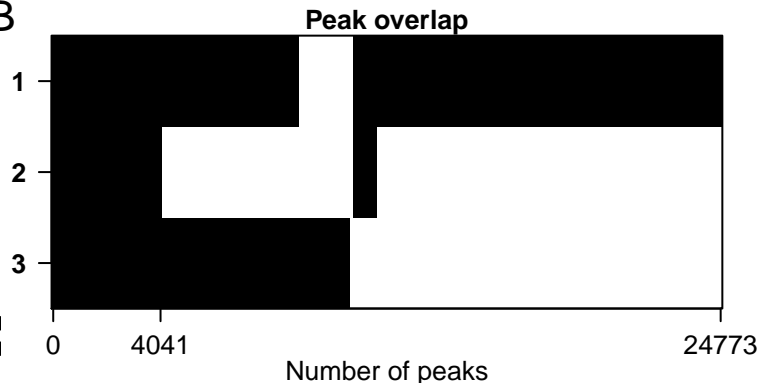

A

## K562 None COREST (sensitive)

1 – SydhK562Corestab24166lggrabUniPk  
2 – SydhK562Corestsc30189lggrabUniPk

Peak detected ■  
No peak detected □

C

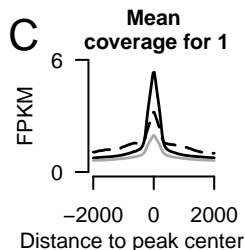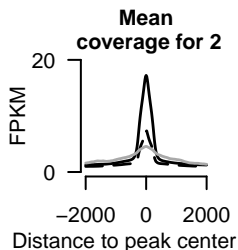

Mean coverage at:

- Common peaks
- - Sample specific peaks
- ... Undetected peaks

D

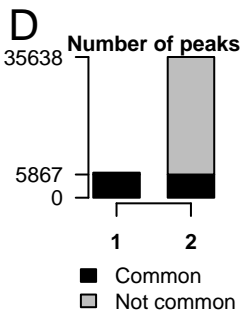

E

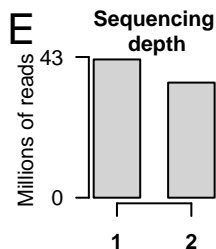

F

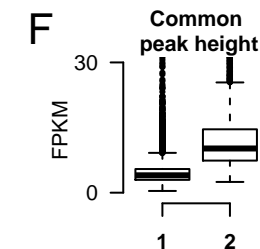

G

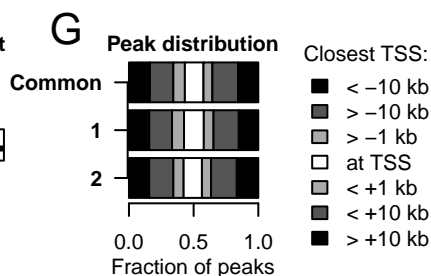

B

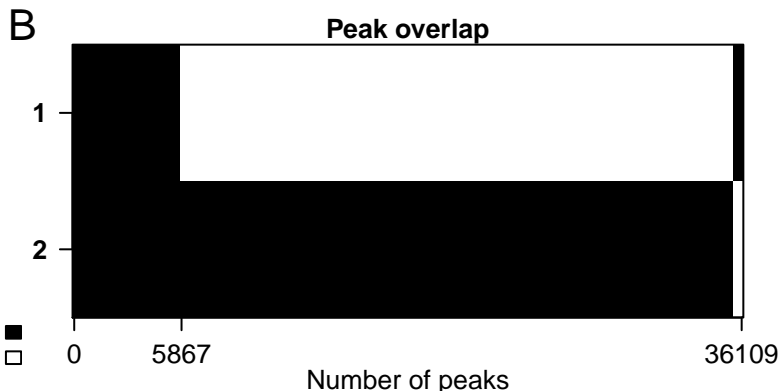

A

## A549 None CTCF (similar)

1 – UtaA549CtcfUniPk  
2 – UwA549CtcfUniPk

Peak detected ■  
No peak detected □

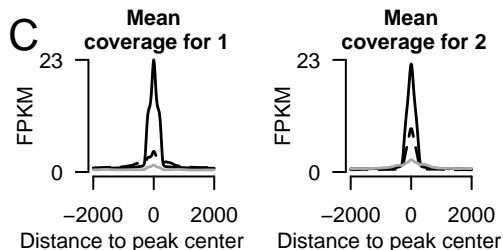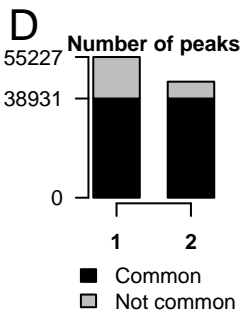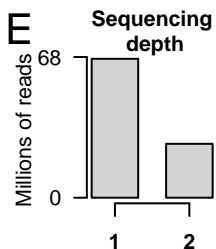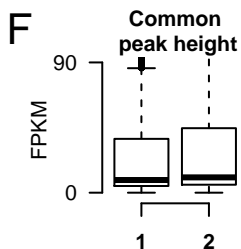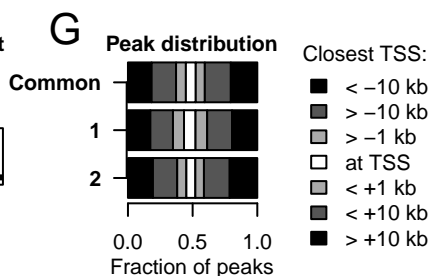

B

Peak overlap

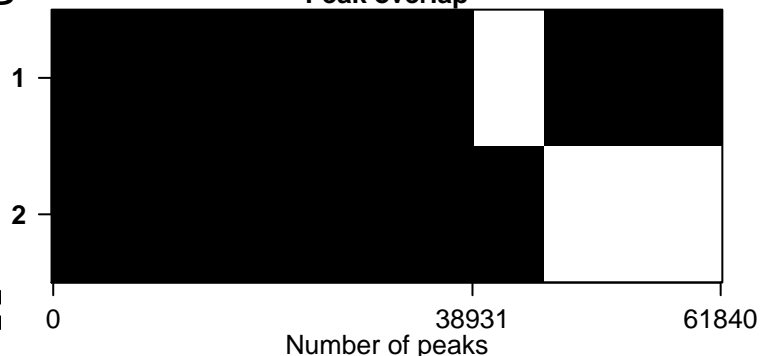

Supplementary figure 14: A549 None CTCF (similar)

A

## GM12878 None CTCF (similar)

- 1 – BroadGm12878CtcfUniPk  
 2 – SydhGm12878Ctcfsc15914c20UniPk  
 3 – UtaGm12878CtcfUniPk  
 4 – UwGm12878CtcfUniPk

Peak detected   
 No peak detected

C

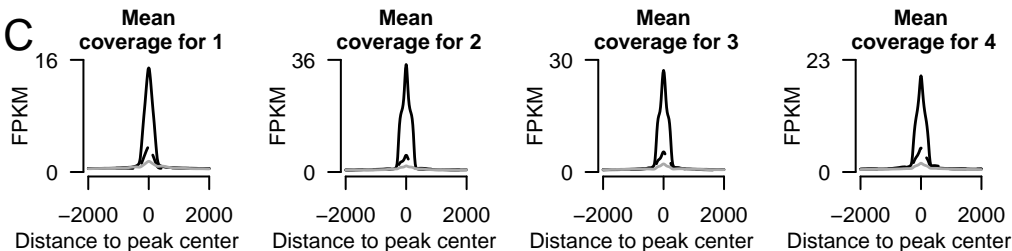

D

### Number of peaks

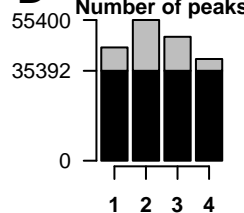

Common  
 Not common

E

### Sequencing depth

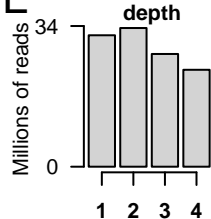

F

### Common peak height

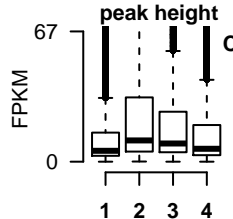

G

### Peak distribution

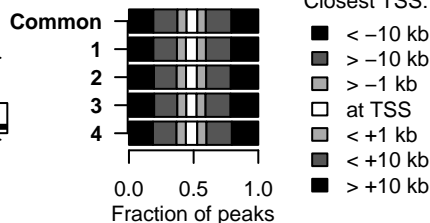

B

### Peak overlap

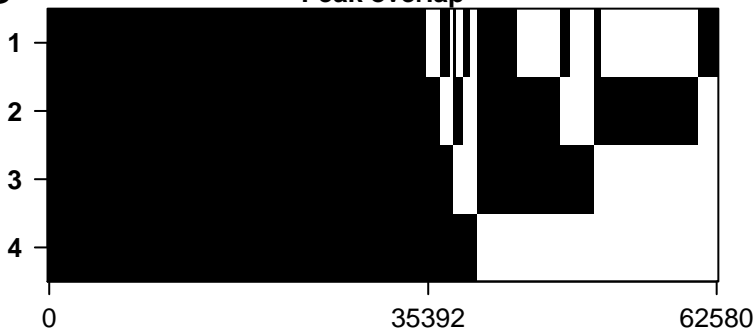

Number of peaks

# A H1-hESC None CTCF (similar)

1 - BroadH1hesCtcfUniPk  
 2 - HaibH1hesCtcfsc5916V0416102UniPk  
 3 - UtaH1hesCtcfUniPk

Peak detected ■  
 No peak detected □

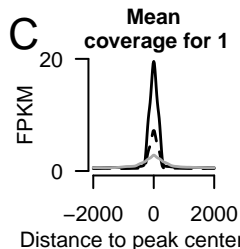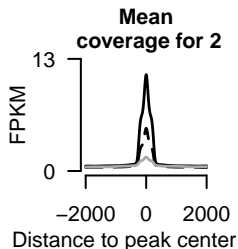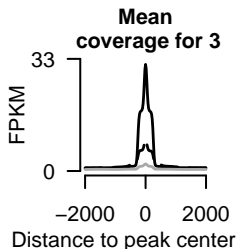

Mean coverage at:

- Common peaks
- - Sample specific peaks
- ... Undetected peaks

# B Peak overlap

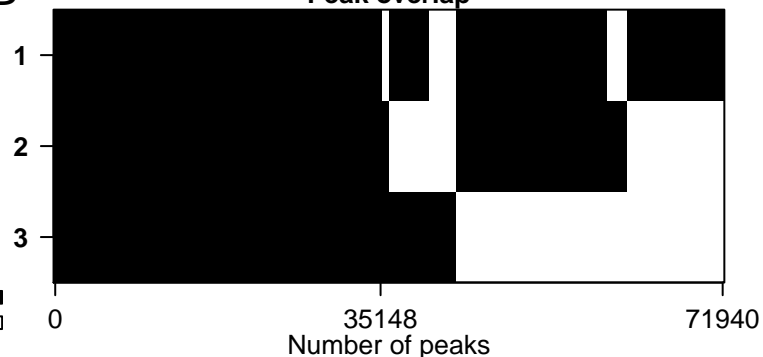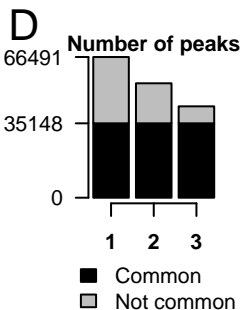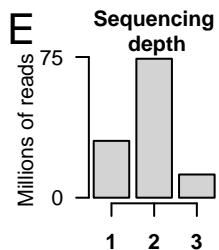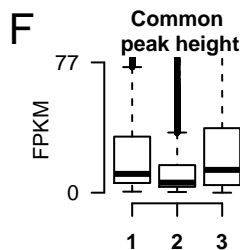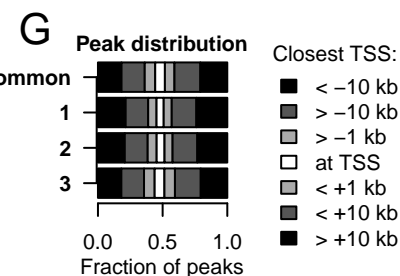

Supplementary figure 16: H1-hESC None CTCF (similar)



A

## HeLa-S3 None CTCF (similar)

- 1 - BroadHelas3CtcfUniPk
- 2 - UtaHelas3CtcfUniPk
- 3 - UwHelas3CtcfUniPk

Peak detected ■  
No peak detected □

C

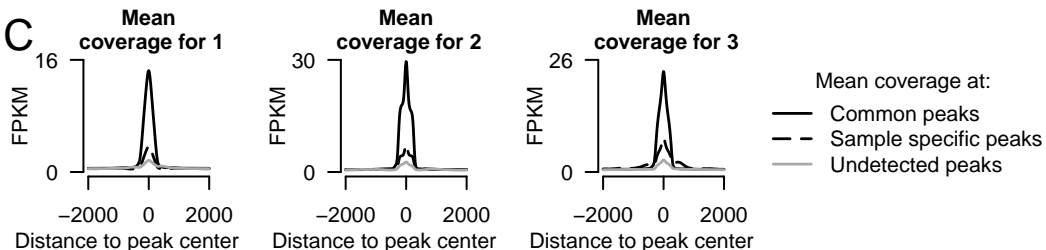

D

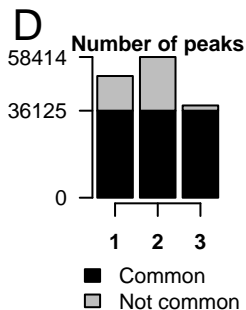

E

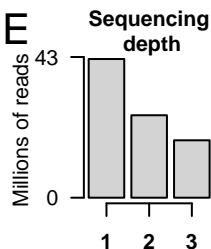

F

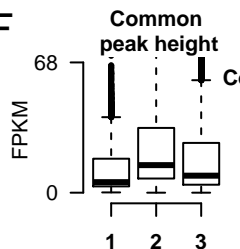

G

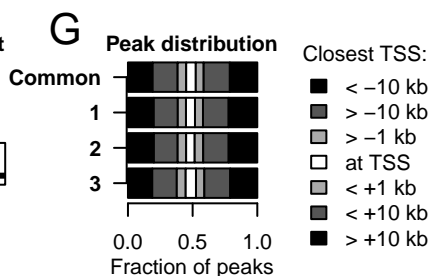

B

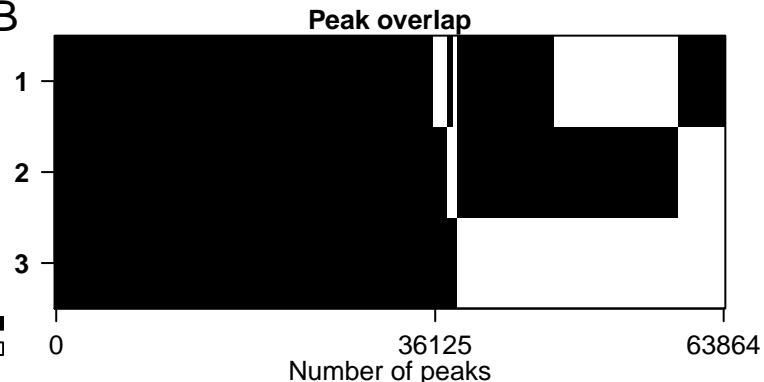

A

## HepG2 None CTCF (similar)

- 1 - BroadHepg2CtcfUniPk
  - 2 - HaibHepg2Ctcfsc5916V0416101UniPk
  - 3 - UtaHepg2CtcfUniPk
  - 4 - UwHepg2CtcfUniPk

Peak detected   
 No peak detected

C

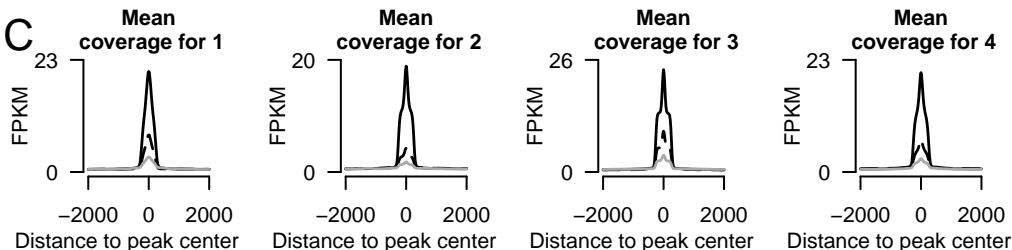

D

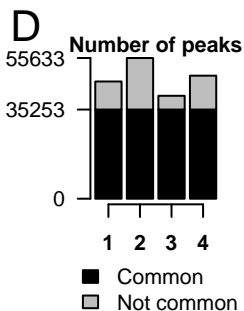

E

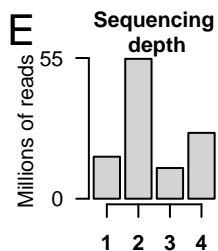

F

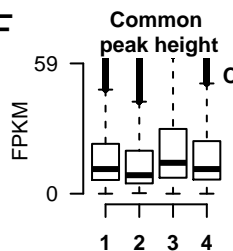

G

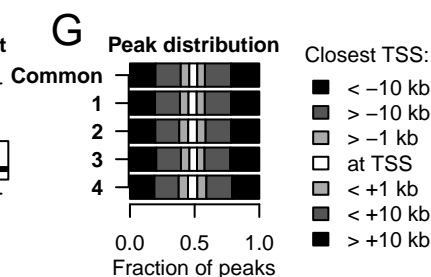

B

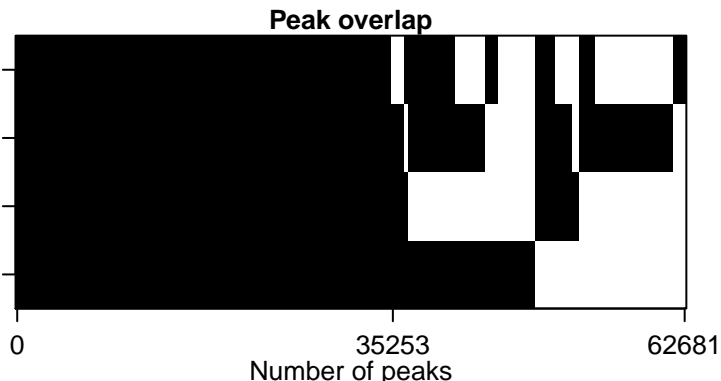

A

## HMEC None CTCF (similar)

1 – BroadHmecCtcfUniPk  
2 – UwHmecCtcfUniPk

Peak detected ■  
No peak detected □

B

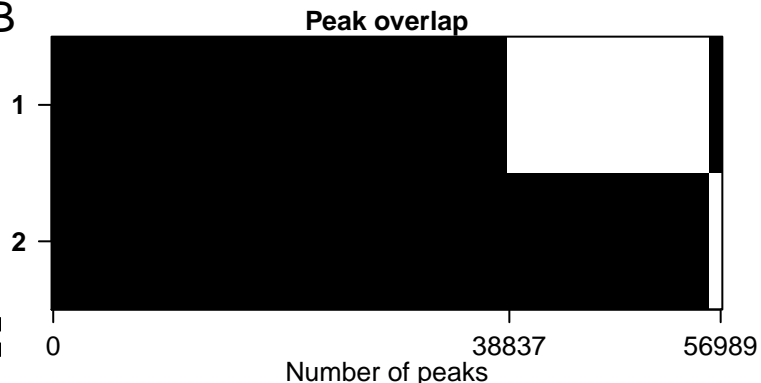

C

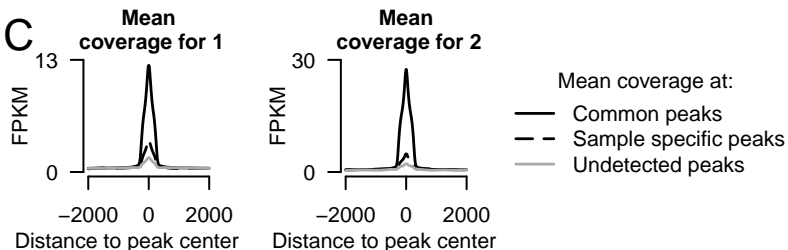

D

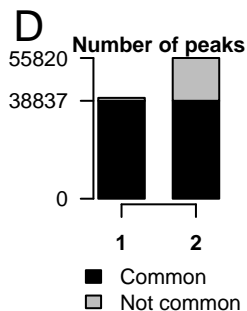

E

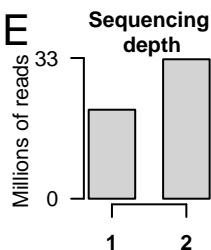

F

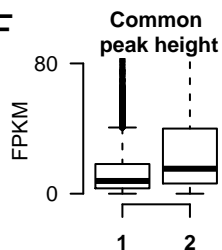

G

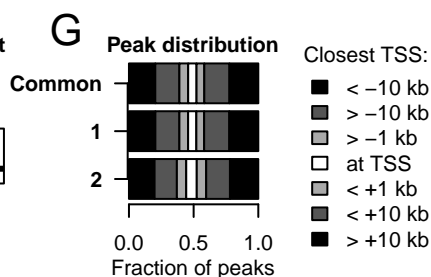

Supplementary figure 19: HMEC None CTCF (similar)

A

## HUVEC None CTCF (similar)

- 1 - BroadHuvecCtcfUniPk
- 2 - UtaHuvecCtcfUniPk
- 3 - UwHuvecCtcfUniPk

Peak detected   
 No peak detected

C

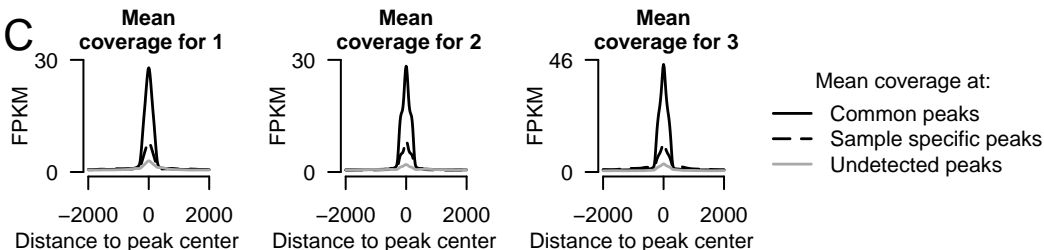

D

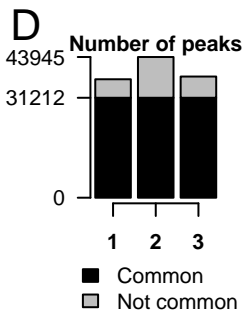

E

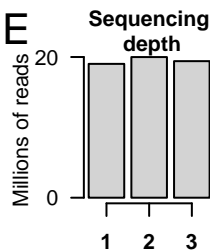

F

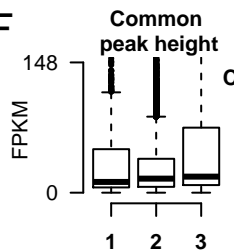

G

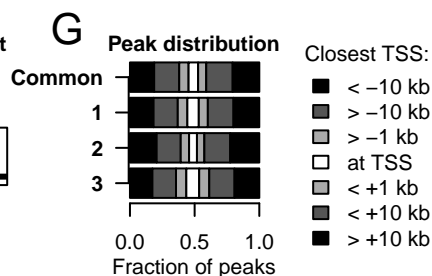

B

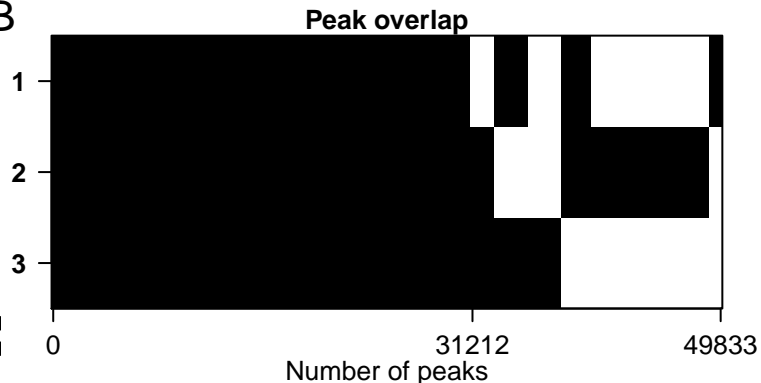

A

## K562 None CTCF (similar)

- 1 – BroadK562CtcfUniPk
- 2 – HaibK562CtcfPcr1xUniPk
- 3 – SydhK562CtcfIlggrabUniPk
- 4 – UtaK562CtcfUniPk
- 5 – UwK562CtcfUniPk

Peak detected   
 No peak detected

B

Peak overlap

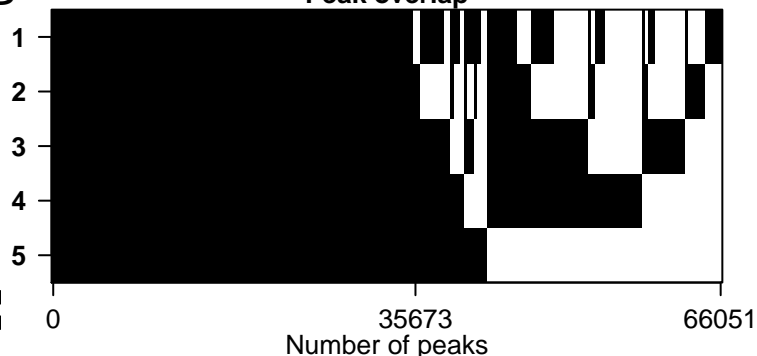

C

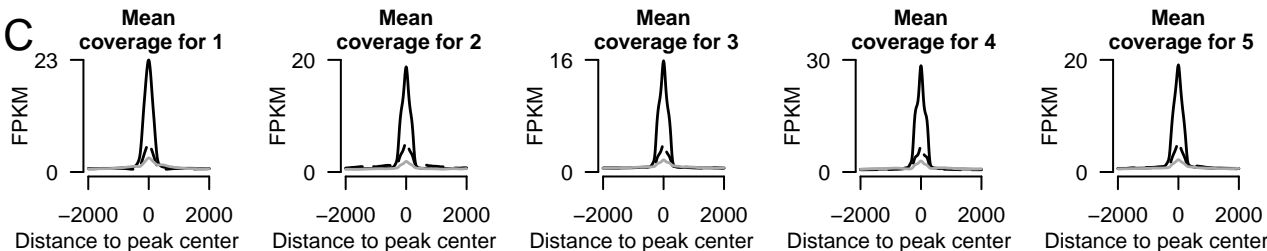

D

Number of peaks

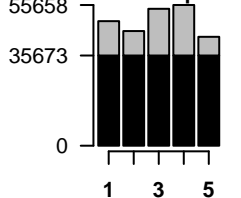

Common   
 Not common

E

Sequencing depth

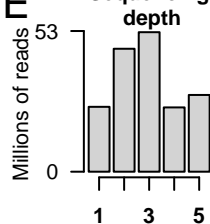

F

Common peak height

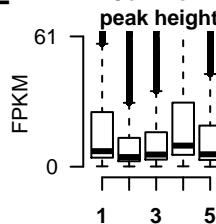

G

Peak distribution

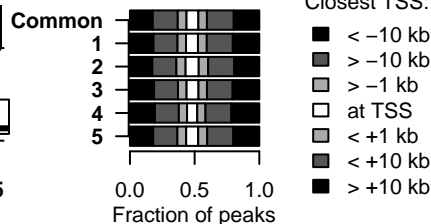

A

## MCF-7 None CTCF (similar)

1 – UtaMcf7CtcfUniPk  
2 – UwMcf7CtcfUniPk

Peak detected ■  
No peak detected □

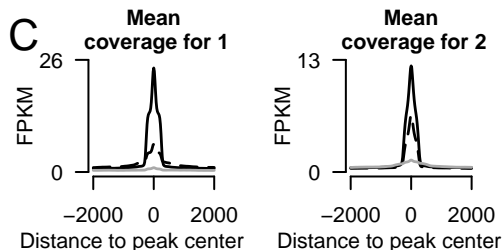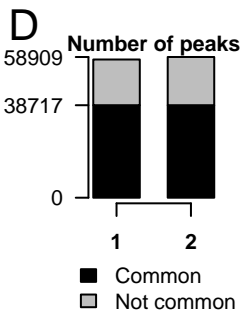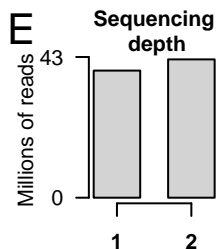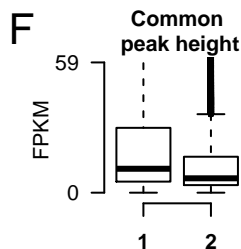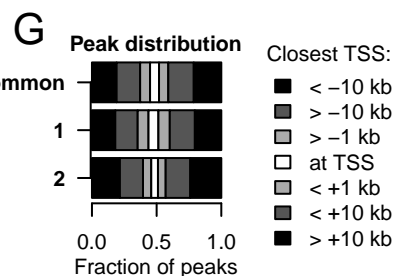

B

## Peak overlap

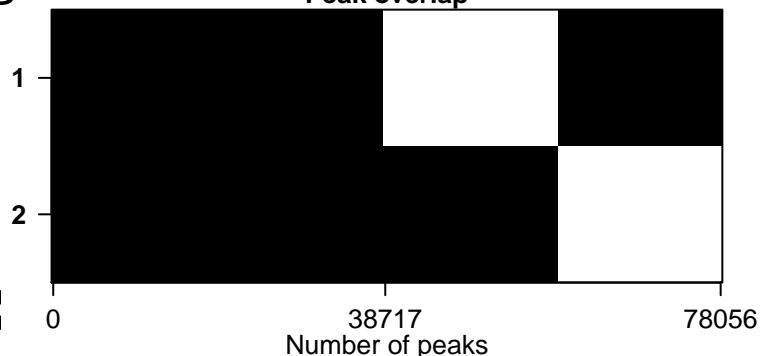

A

## NHEK None CTCF (similar)

- 1 – BroadNhekCtcfUniPk  
2 – UtaNhekCtcfUniPk  
3 – UwNhekCtcfUniPk

Peak detected ■  
No peak detected □

B

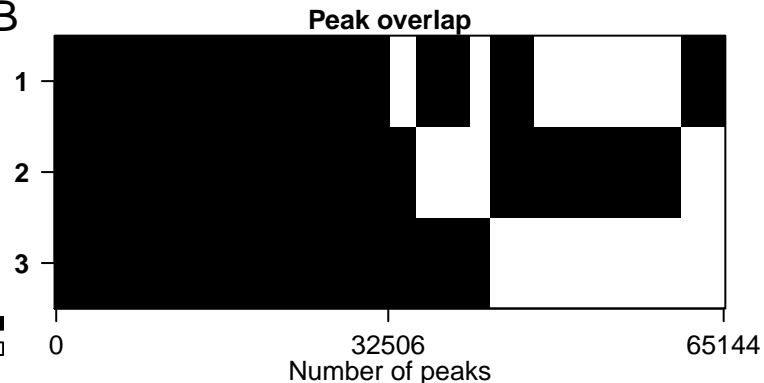

C

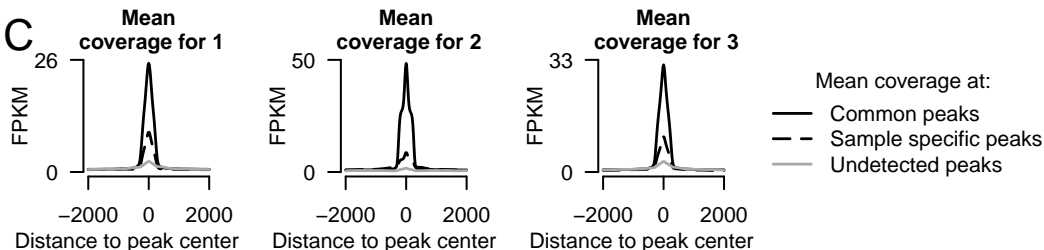

D

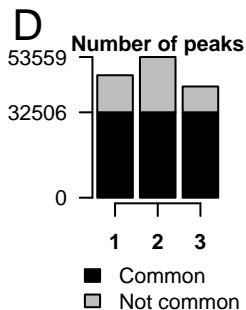

E

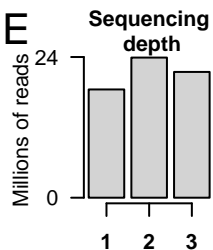

F

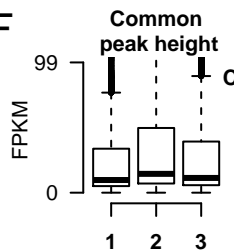

G

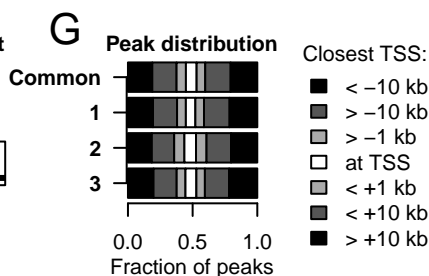

Supplementary figure 23: NHEK None CTCF (similar)

A

## NHLF None CTCF (similar)

1 – BroadNhlfcTctfUniPk  
2 – UwNhlfcTctfUniPk

Peak detected ■  
No peak detected □

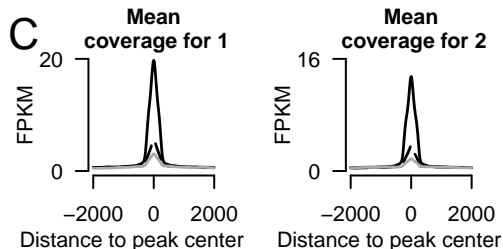

D

### Number of peaks

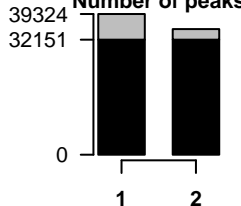

■ Common  
□ Not common

E

### Sequencing depth

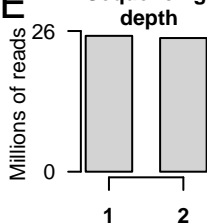

F

### Common peak height

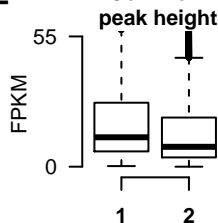

G

### Peak distribution

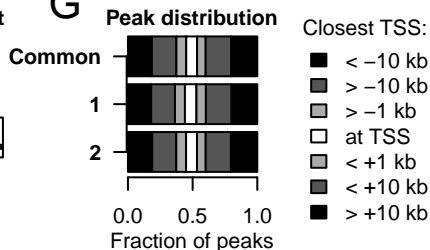

B

### Peak overlap

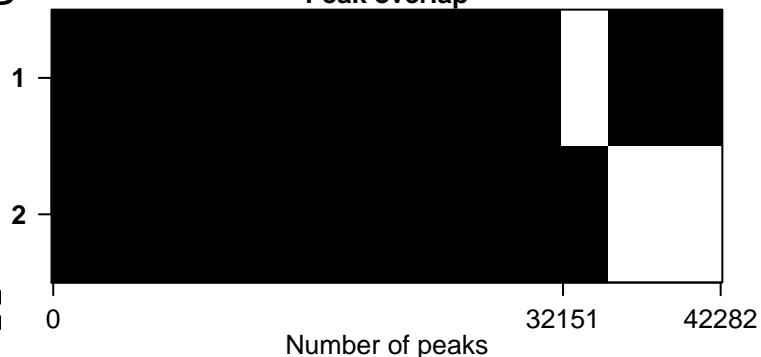



**A** SK-N-SH RA None CTCF  
(similar)

1 - HaibSknshraCtcfV0416102UniPk  
2 - UwSknshraCtcfUniPk

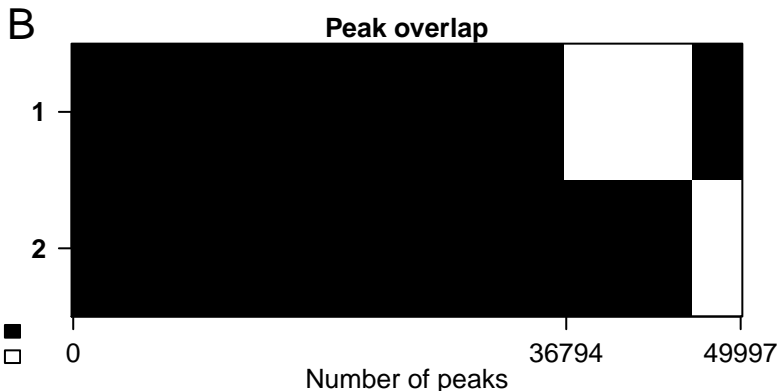

Peak detected ■  
No peak detected □

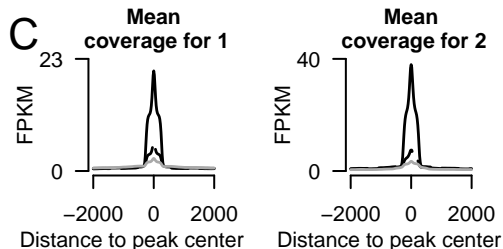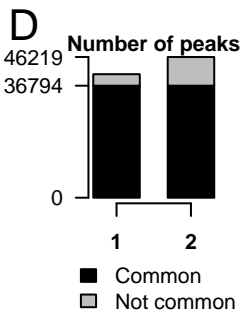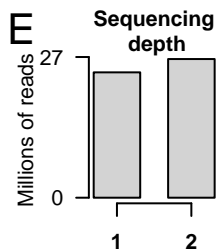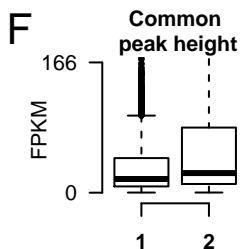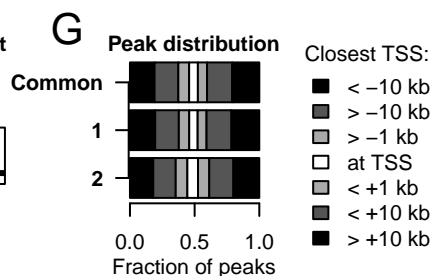

Supplementary figure 25: SK-N-SH RA None CTCF (similar)

A

## K562 None E2F6 (similar)

1 – HaibK562E2f6V0416102UniPk  
2 – SydhK562E2f6UcdUniPk

Peak detected ■  
No peak detected □

C

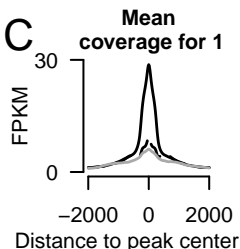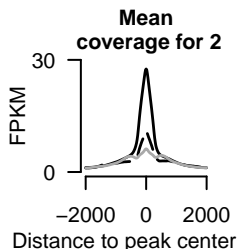

Mean coverage at:

- Common peaks
- - Sample specific peaks
- Undetected peaks

D

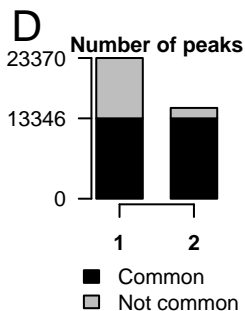

E

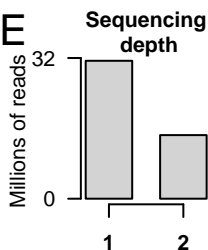

F

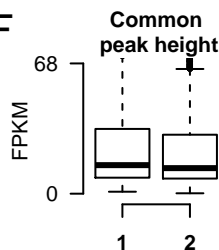

G

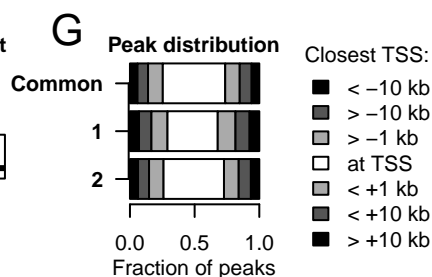

B

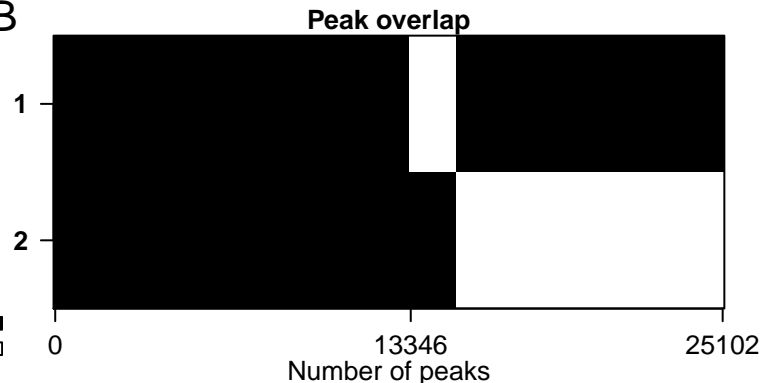

A

## GM12878 None EBF1 (similar)

1 – HaibGm12878Ebf1sc137065Pcr1xUniPk  
2 – SydhGm12878Ebf1sc137065UniPk

Peak detected ■  
No peak detected □

B

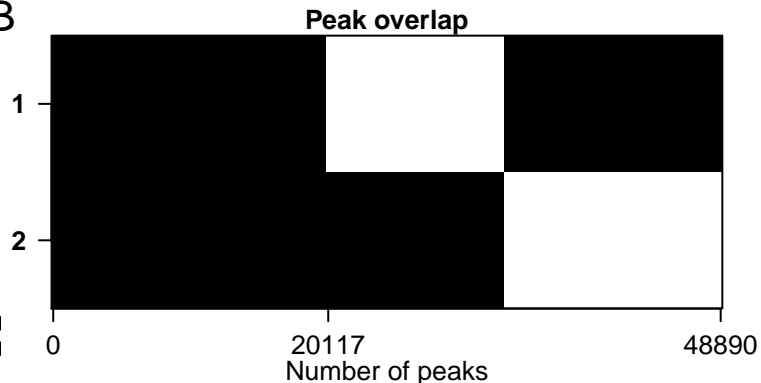

C

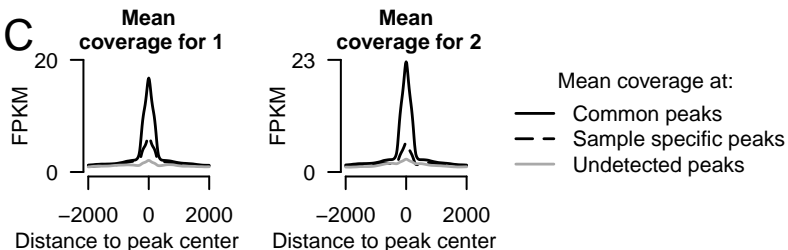

D

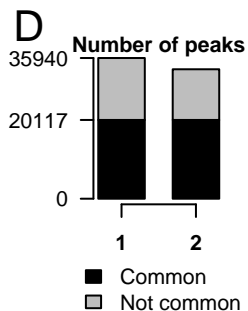

E

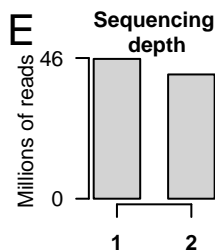

F

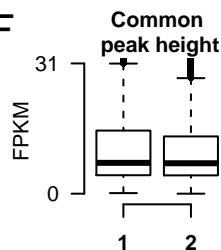

G

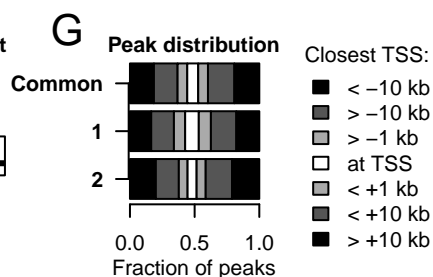

A

## HepG2 None FOXA1 (similar)

1 – HaibHepg2Foxa1sc101058V0416101UniPk  
2 – HaibHepg2Foxa1sc6553V0416101UniPk

Peak detected ■  
No peak detected □

C

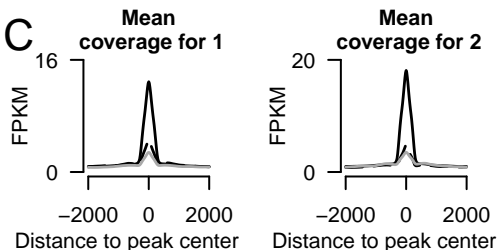

D

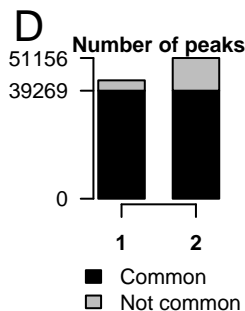

E

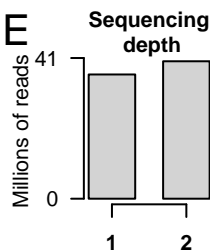

F

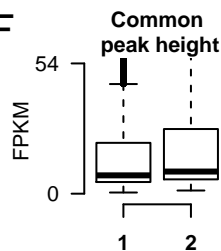

G

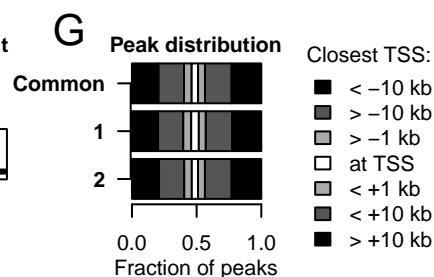

B

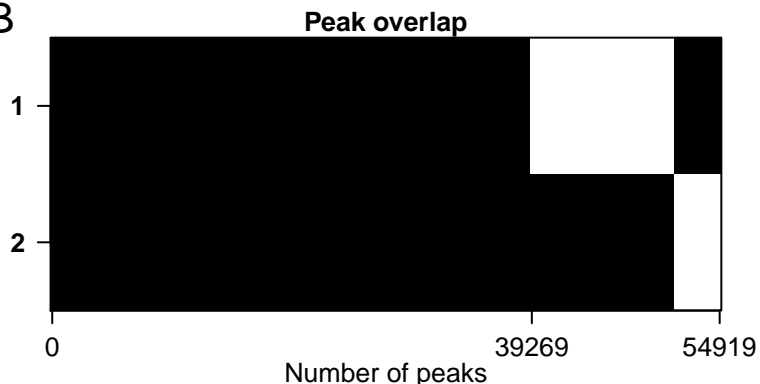

A

## K562 None GATA2 (dissimilar)

1 – HaibK562Gata2sc267Pcr1xUniPk  
2 – SydhK562Gata2UcdUniPk

Peak detected ■  
No peak detected □

C

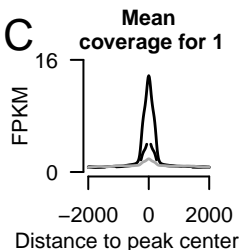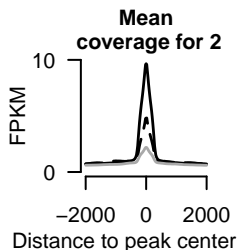

Mean coverage at:

— Common peaks  
- - Sample specific peaks  
— Undetected peaks

D

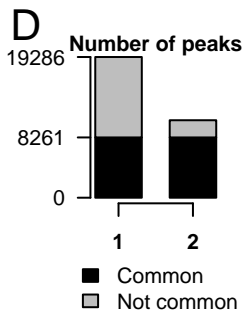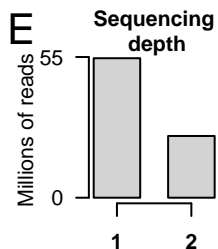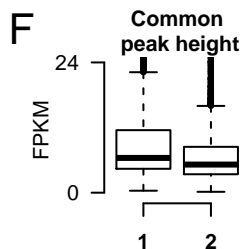

E

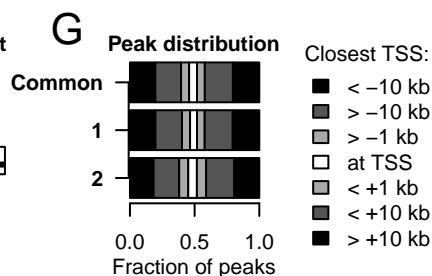

B

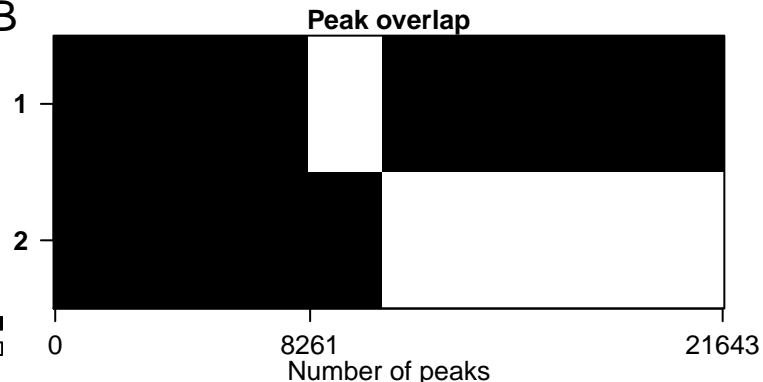

A

## MCF-7 None GATA3 (dissimilar)

1 – SydhMcf7Gata3UcdUniPk  
2 – SydhMcf7Gata3sc269UcdUniPk

B

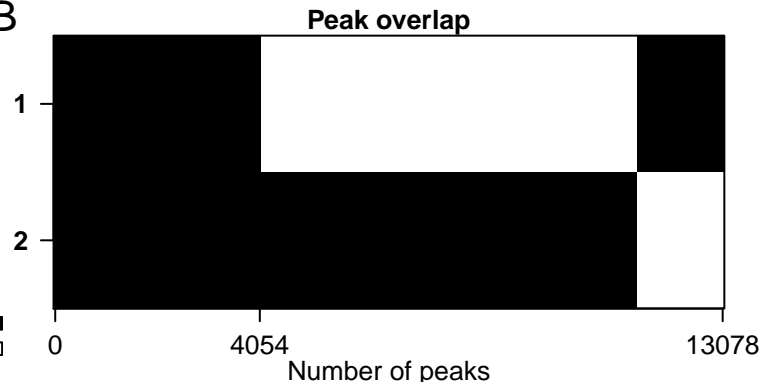

Peak detected ■  
No peak detected □

C

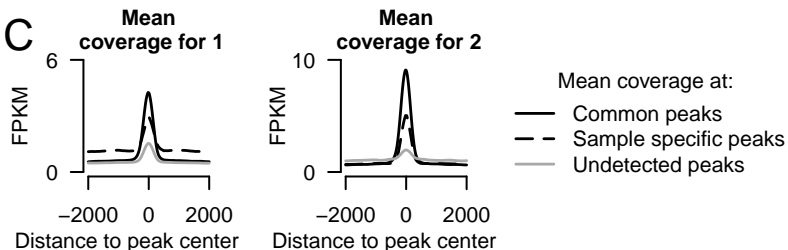

D

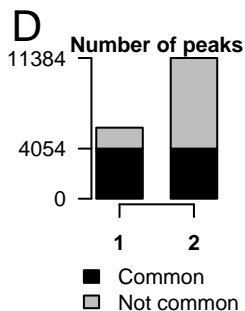

E

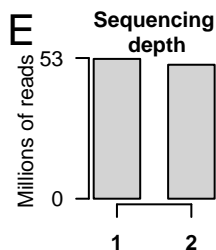

F

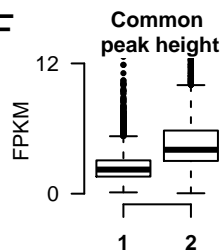

G

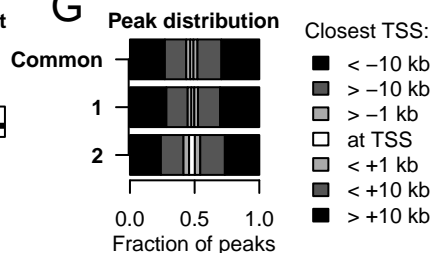

A

## K562 None HDAC2 (dissimilar)

1 - BroadK562Hdac2a300705aUniPk  
2 - HaibK562Hdac2sc6296V0416102UniPk

Peak detected ■  
No peak detected □

C

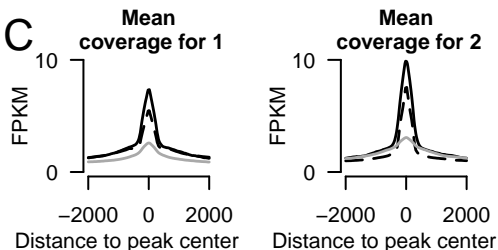

D

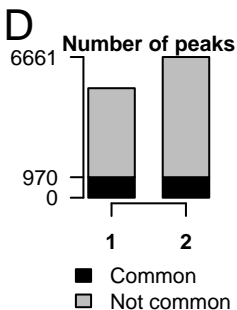

E

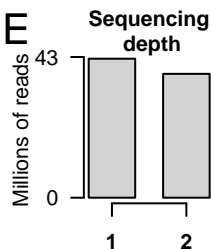

B

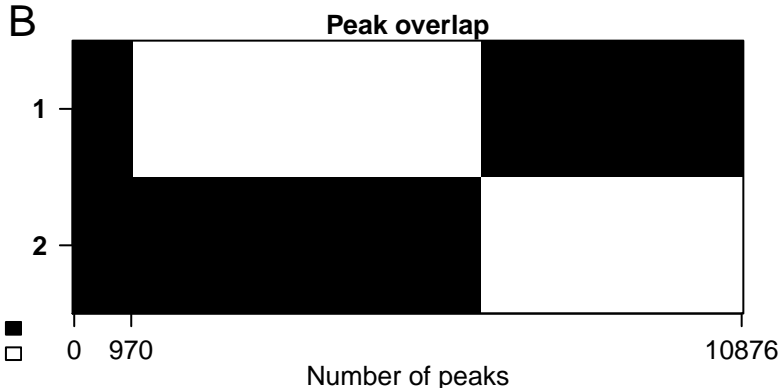

F

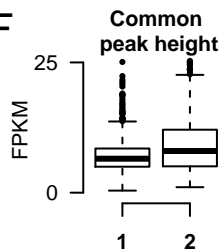

G

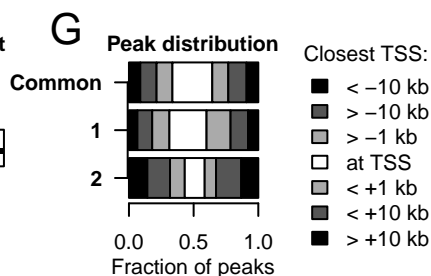

A

# H1-hESC None JunD (dissimilar)

1 - HaibH1hescJundV0416102UniPk  
2 - SydhH1hescJundIlggrabUniPk

Peak detected ■  
No peak detected □

B

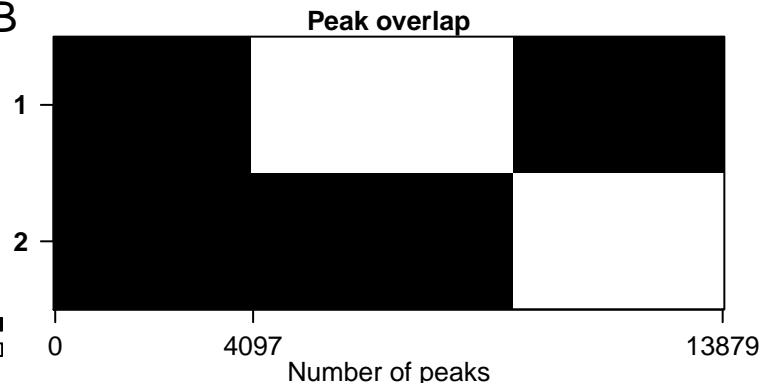

C

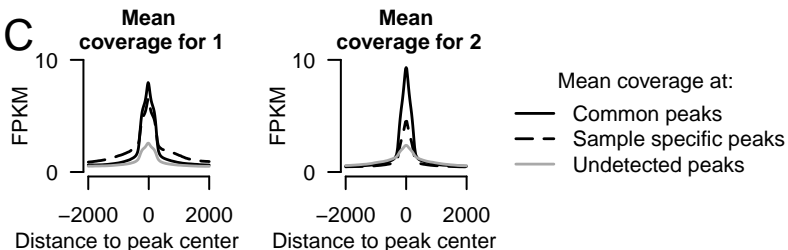

D

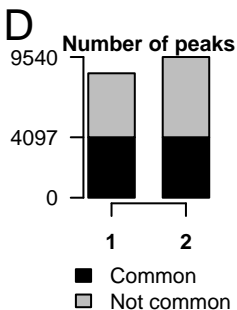

E

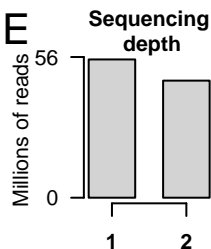

F

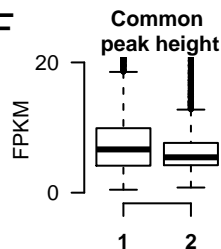

G

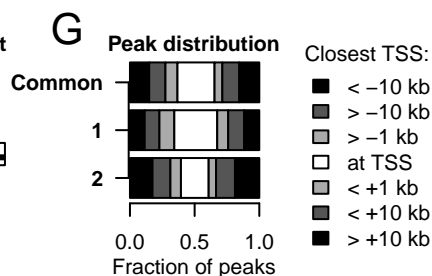



A

## HepG2 None JunD (dissimilar)

1 – HaibHepg2JundPcr1xUniPk  
2 – SydhHepg2JundIggrabUniPk

Peak detected ■  
No peak detected □

B

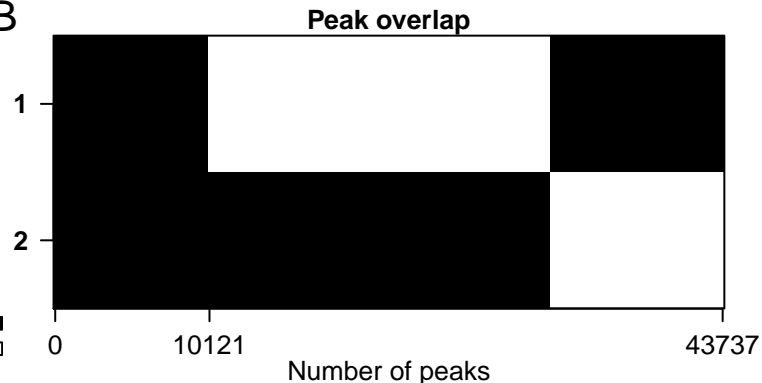

C

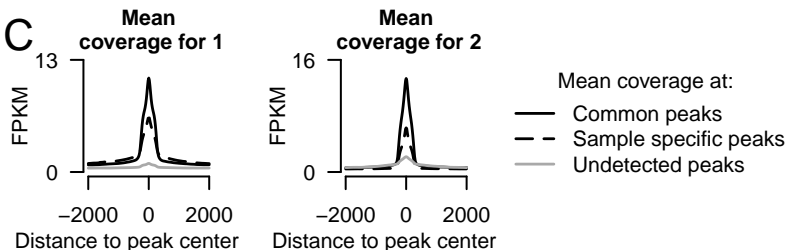

D

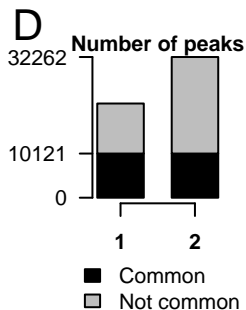

E

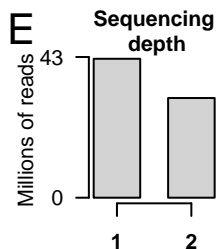

F

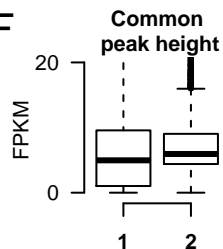

G

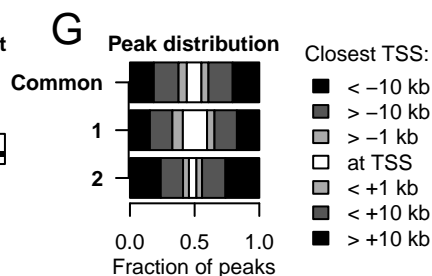

A

## HepG2 None MafK (similar)

1 – SydhHepg2Mafkab50322lggrabUniPk  
2 – SydhHepg2Mafksc477lggrabUniPk

Peak detected ■  
No peak detected □

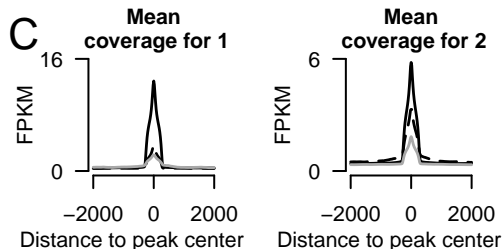

D

### Number of peaks

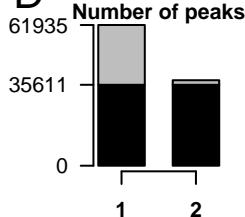

■ Common  
 ■ Not common

E

### Sequencing depth

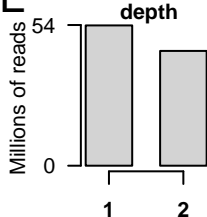

B

### Peak overlap

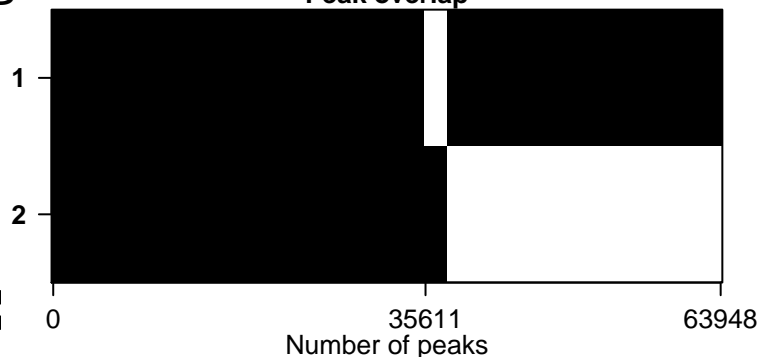

F

### Common peak height

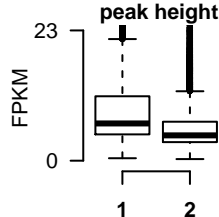

G

### Peak distribution

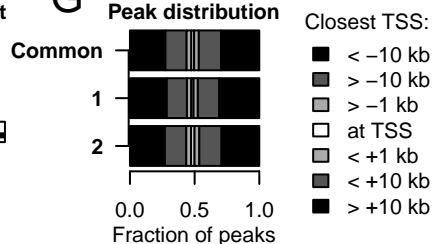

A

## K562 None Max (similar)

1 – HaibK562MaxV0416102UniPk  
2 – SydhK562MaxIgrgrabUniPk

Peak detected ■  
No peak detected □

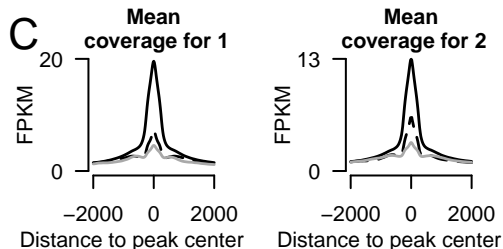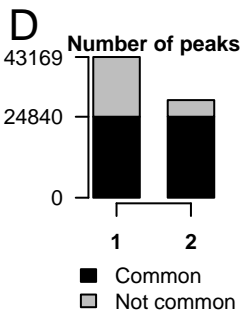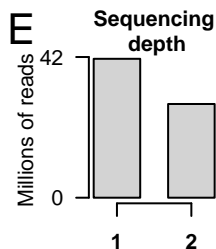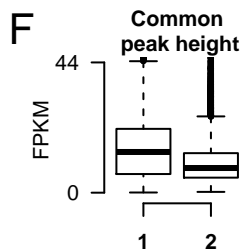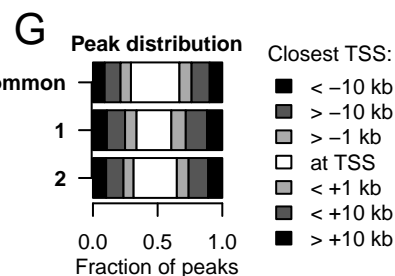

B

## Peak overlap

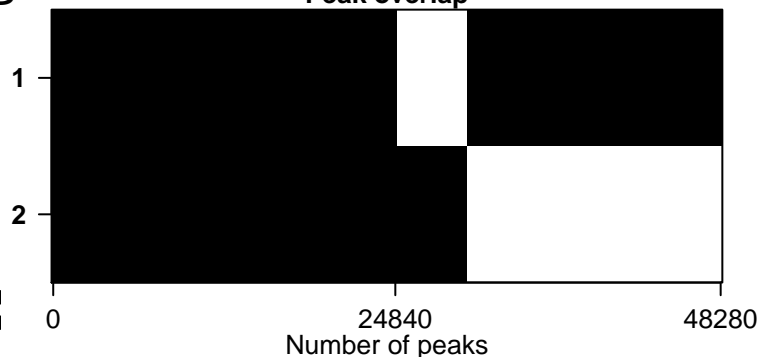

A

## HepG2 None NRSF (dissimilar)

1 – HaibHepg2NrsfPcr2xUniPk  
2 – HaibHepg2NrsfV0416101UniPk

Peak detected ■  
No peak detected □

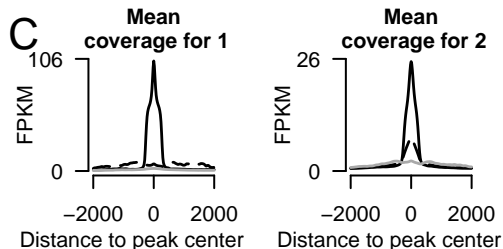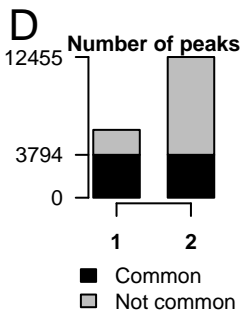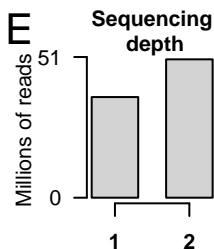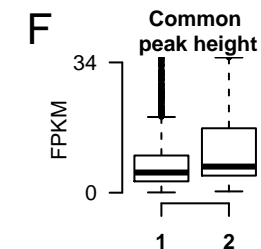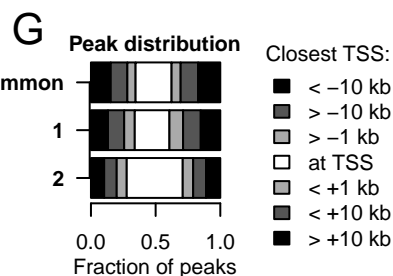

B

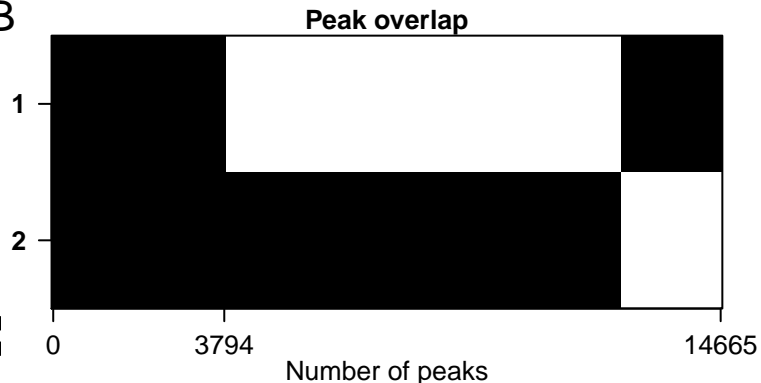

Supplementary figure 36: HepG2 None NRSF (dissimilar)

A

## SK-N-SH None NRSF (dissimilar)

1 – HaibSknshNrsfPcr2xUniPk  
2 – HaibSknshNrsfV0416101UniPk

B

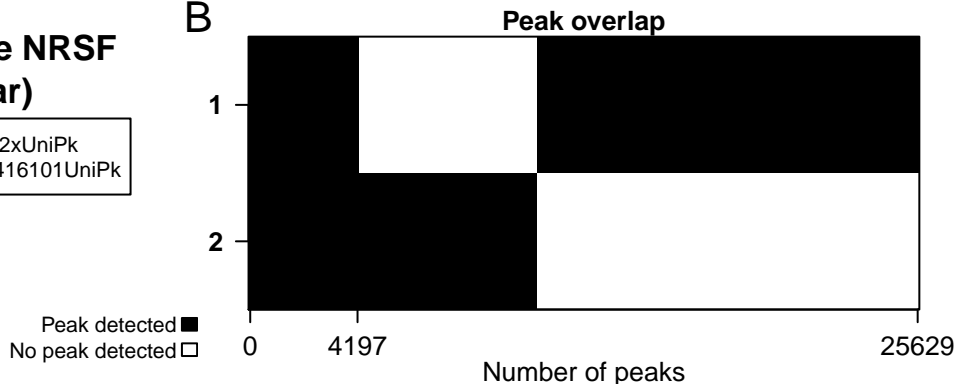

C

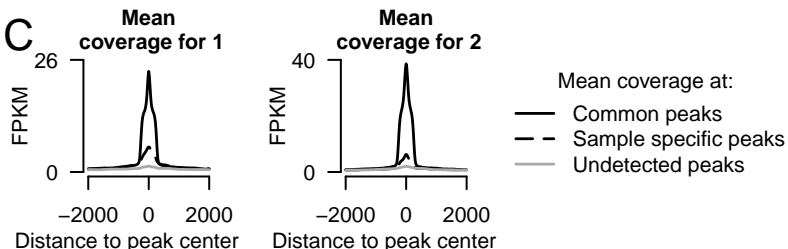

D

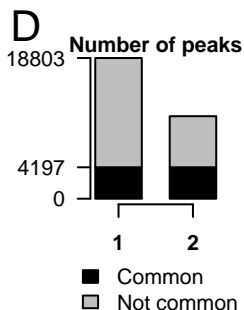

E

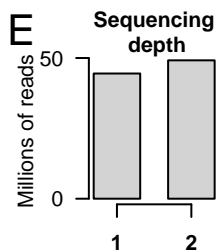

F

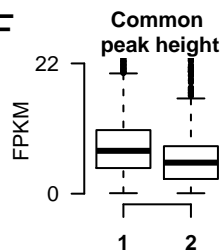

G

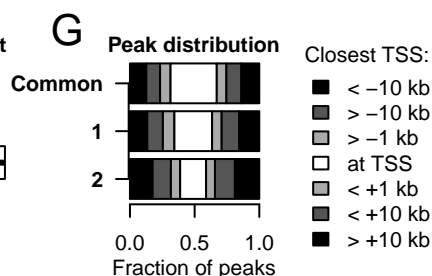

A

## GM12878 None p300 (dissimilar)

1 – HaibGm12878P300Pcr1xUniPk  
2 – SydhGm12878P300IggmusUniPk  
3 – SydhGm12878P300bUniPk

Peak detected ■  
No peak detected □

B

### Peak overlap

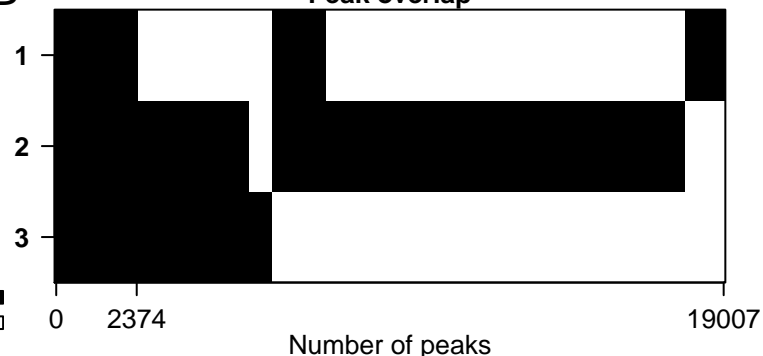

C

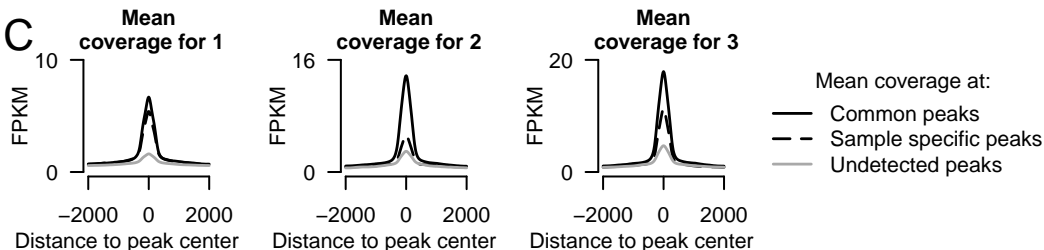

D

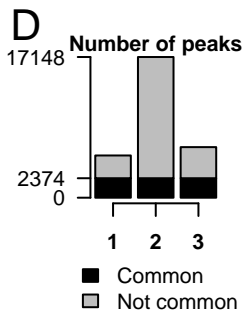

E

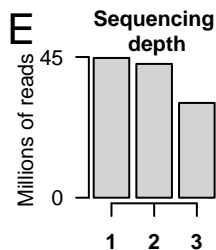

F

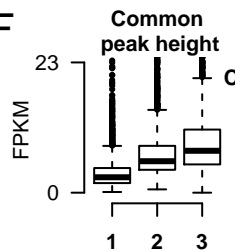

G

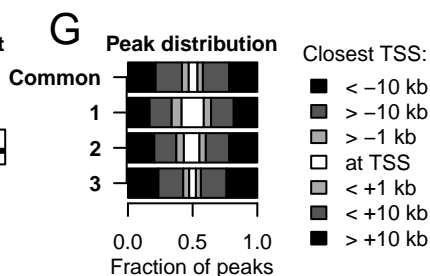

A

## HepG2 None p300 (sensitive)

1 – HaibHepg2P300V0416101UniPk  
2 – SydhHepg2P300sc582lggrabUniPk

Peak detected ■  
No peak detected □

B

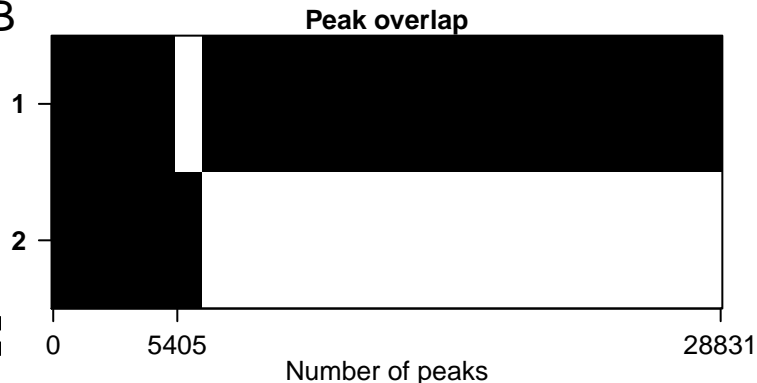

C

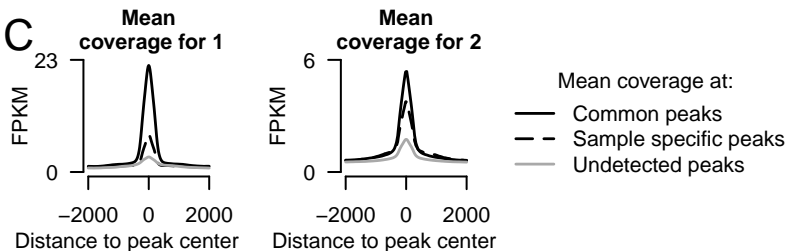

D

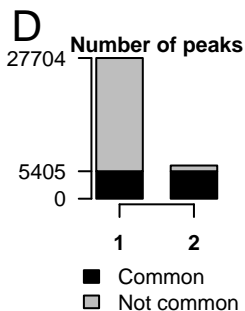

E

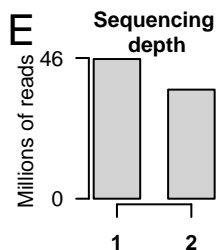

F

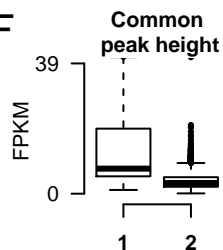

G

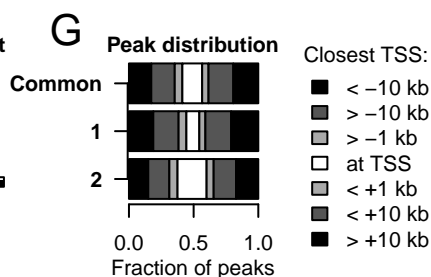

A

## K562 None p300 (dissimilar)

1 – BroadK562P300UniPk  
2 – SydhK562P300IlggrabUniPk

Peak detected ■  
No peak detected □

C

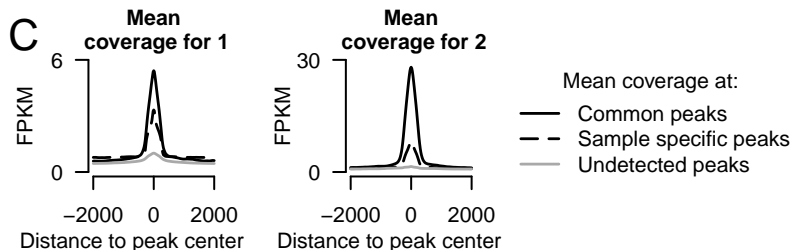

D

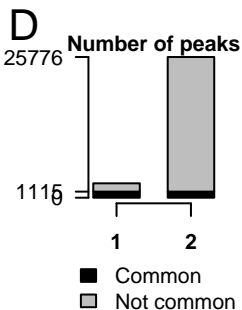

E

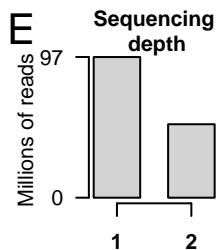

F

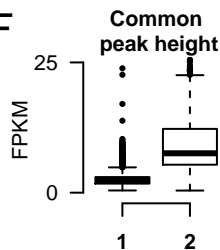

G

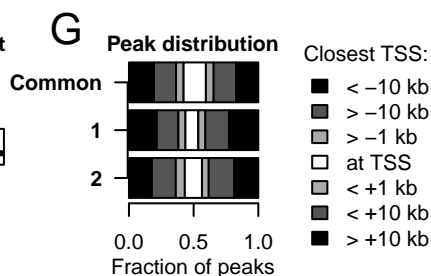

B

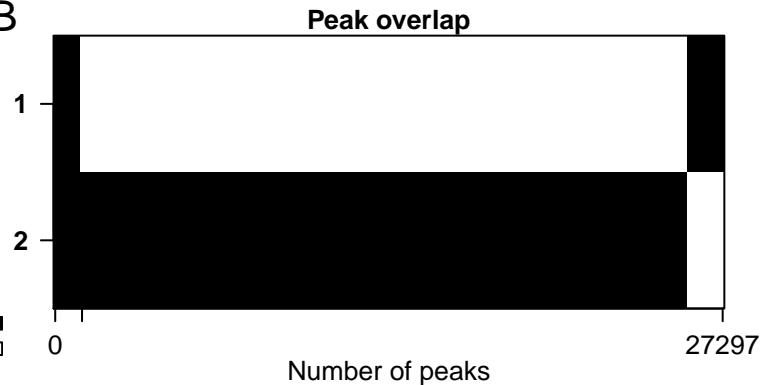



A

## GM12878 None PAX5 (similar)

1 – HaibGm12878Pax5c20Pcr1xUniPk  
2 – HaibGm12878Pax5n19Pcr1xUniPk

Peak detected ■  
No peak detected □

B

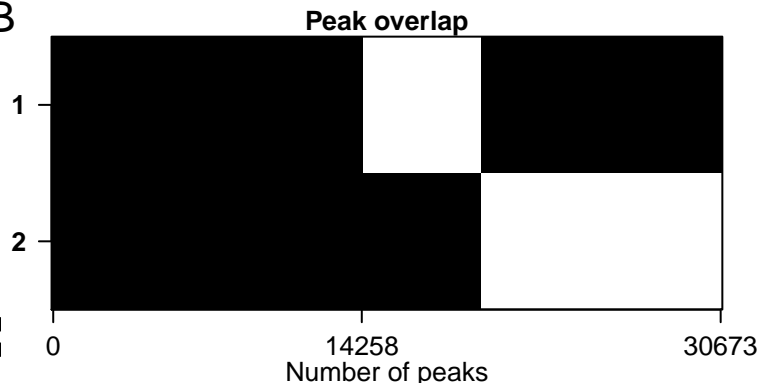

C

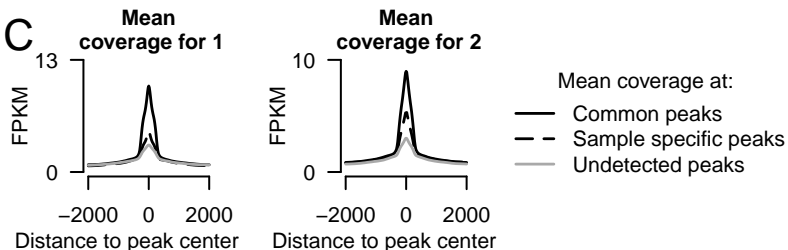

D

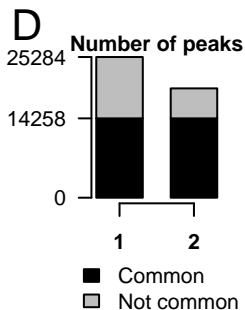

E

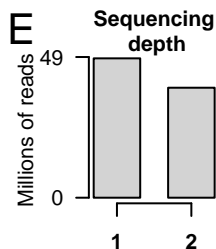

F

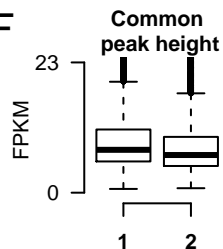

G

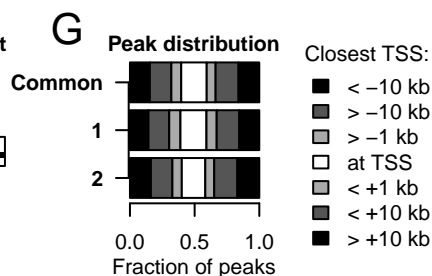

# A K562 None Pol2 phosphoS2 (dissimilar)

1 - SydhK562Pol2s2IggrabUniPk  
2 - SydhK562Pol2s2UniPk

Peak detected ■  
No peak detected □

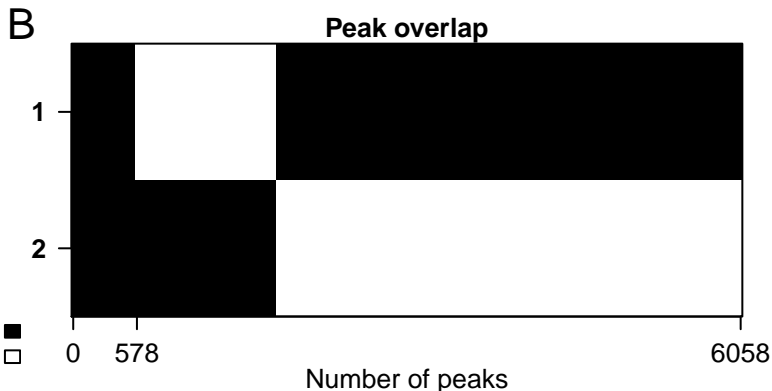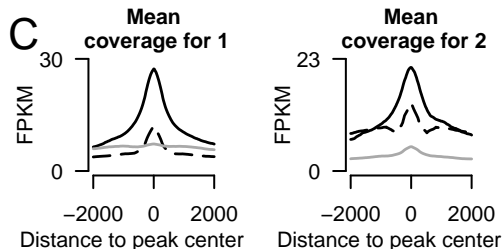

Mean coverage at:

- Common peaks
- - Sample specific peaks
- Undetected peaks

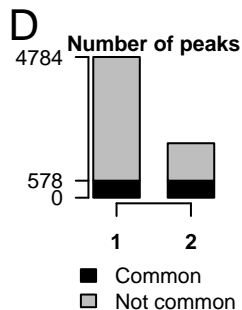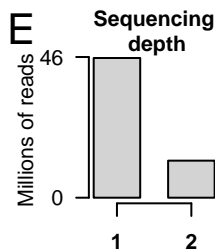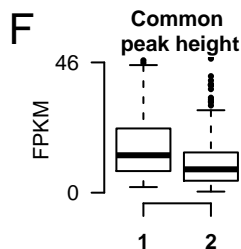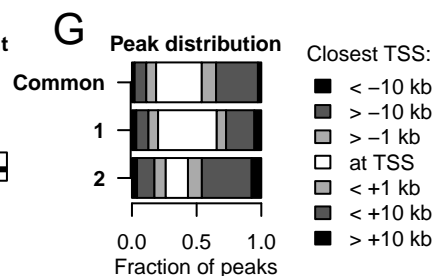

A

## GM12878 None Pol2 (sensitive)

1 – HaibGm12878Pol2Pcr2xUniPk  
 2 – SydhGm12878Pol2IggmusUniPk  
 3 – SydhGm12878Pol2UniPk  
 4 – UtaGm12878Pol2UniPk

Peak detected ■  
 No peak detected □

B

Peak overlap

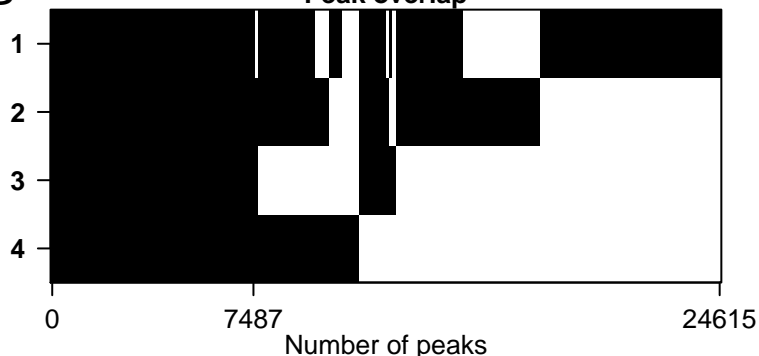

C

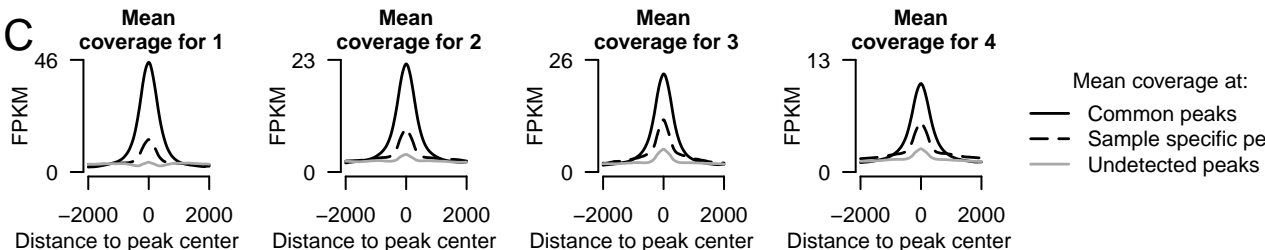

D

Number of peaks

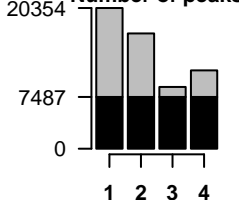

■ Common  
 □ Not common

E

Sequencing depth

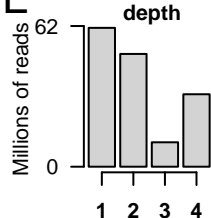

F

Common peak height

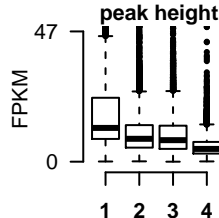

G

Peak distribution

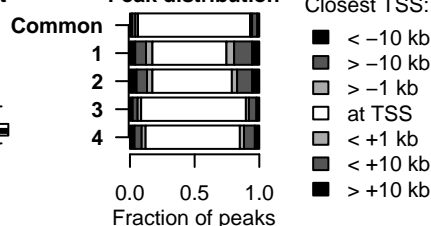

A

## GM12891 None Pol2 (similar)

1 – HaibGm12891Pol2Pcr1xUniPk  
2 – SydhGm12891Pol2IggmusUniPk

Peak detected ■  
No peak detected □

C

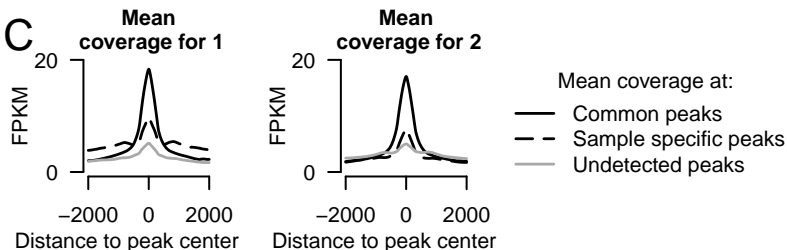

D

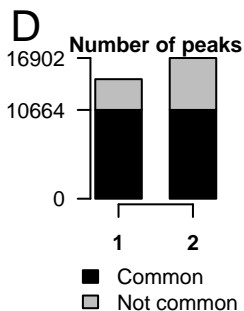

E

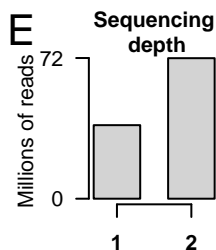

F

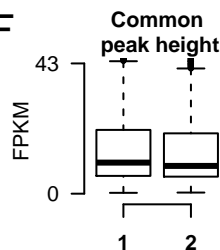

G

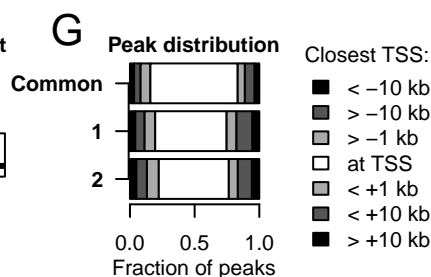

B

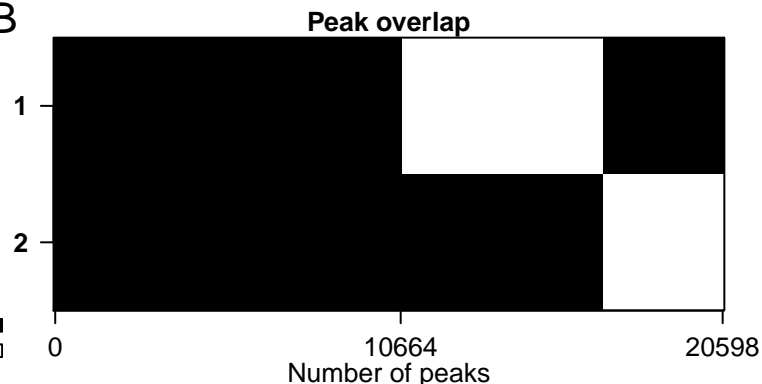

A

## GM12892 None Pol2 (similar)

1 – HaibGm12892Pol2V0416102UniPk  
2 – SydhGm12892Pol2IggmusUniPk

Peak detected ■  
No peak detected □

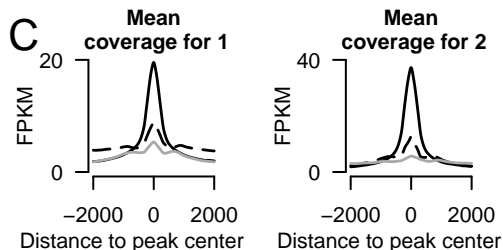

**D** Number of peaks

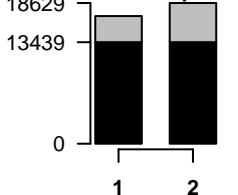

■ Common  
□ Not common

**E** Sequencing depth

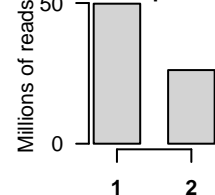

B

## Peak overlap

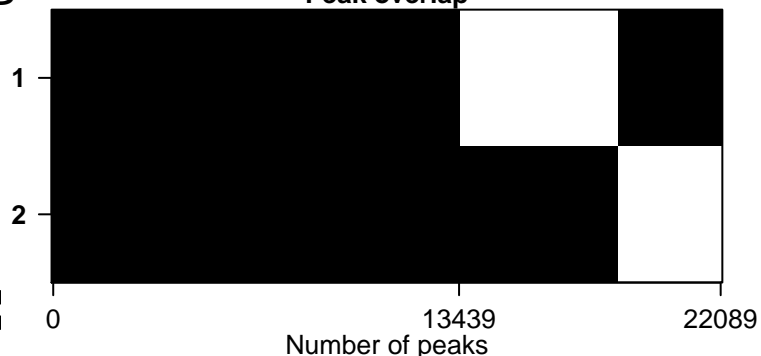

D

**F** Common peak height

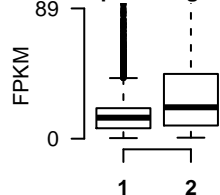

G

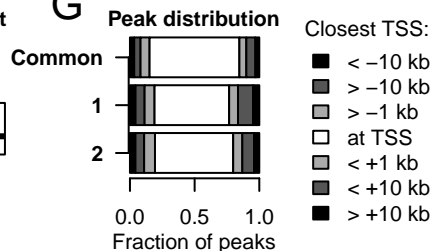

A

# H1-hESC None Pol2 (similar)

1 - HaibH1hescPol2V0416102UniPk  
2 - UtaH1hescPol2UniPk

Peak detected ■  
No peak detected □

B

Peak overlap

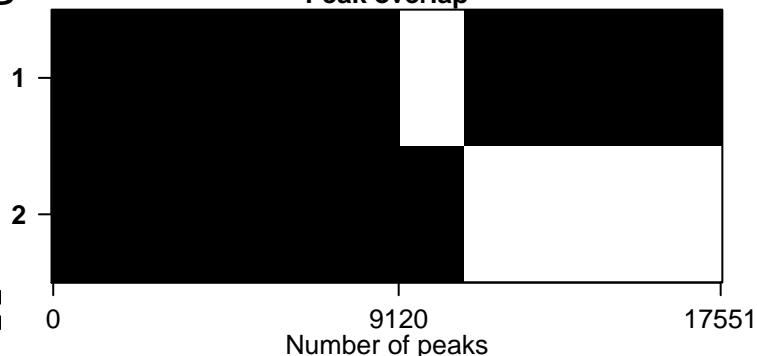

C

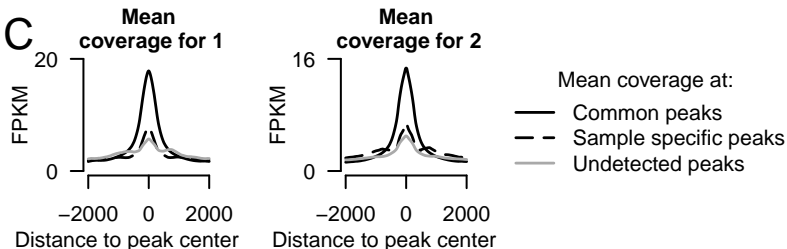

D

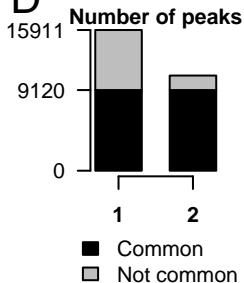

E

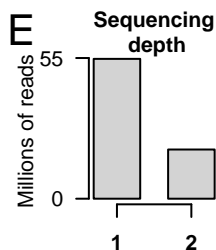

F

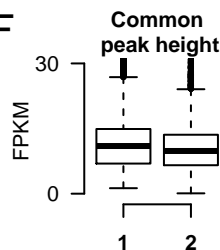

G

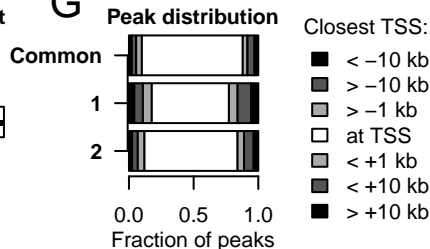

A

## HeLa-S3 None Pol2 (similar)

1 – HaibHelas3Pol2Pcr1xUniPk  
2 – SydhHelas3Pol2UniPk  
3 – UtaHelas3Pol2UniPk

Peak detected ■  
No peak detected □

B

## Peak overlap

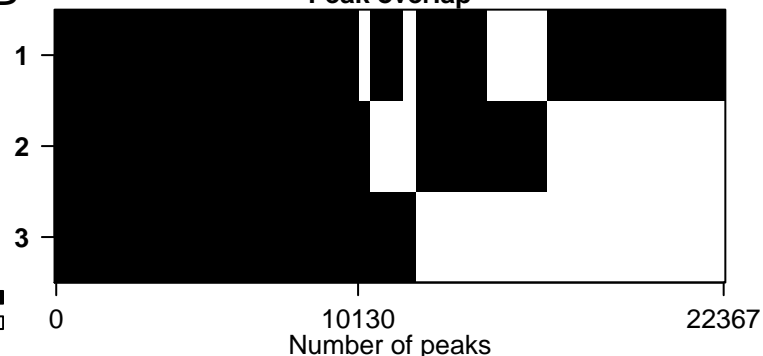

C

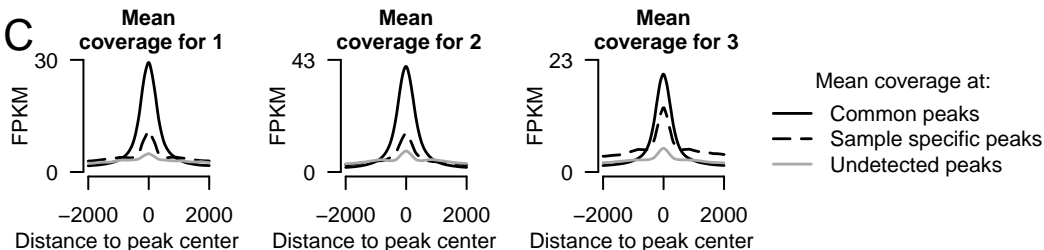

D

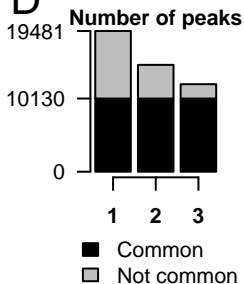

E

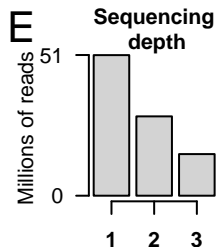

F

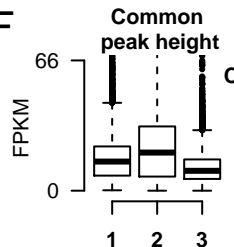

G

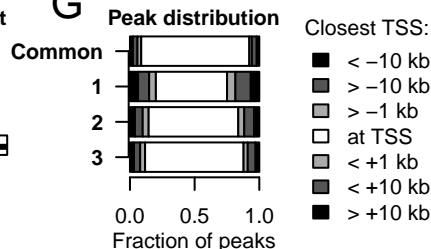

A

## HepG2 None Pol2 (dissimilar)

- 1 – HaibHepg2Pol2Pcr2xUniPk  
 2 – SydhHepg2Pol2lggrabUniPk  
 3 – UtaHepg2Pol2UniPk

Peak detected ■  
 No peak detected □

C

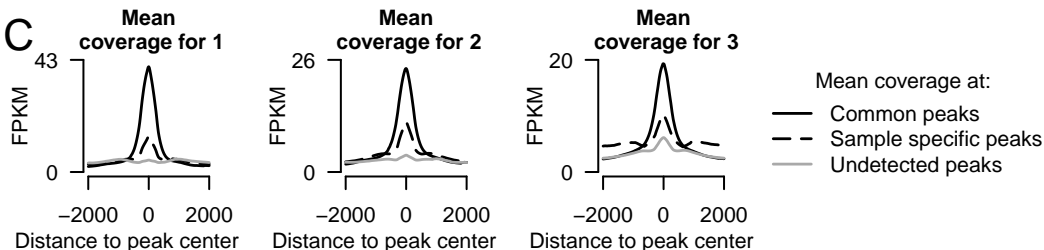

D

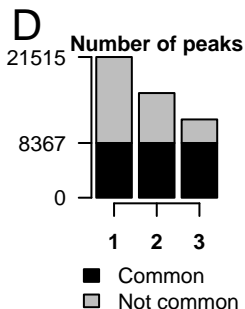

E

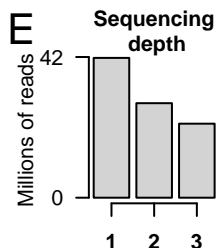

F

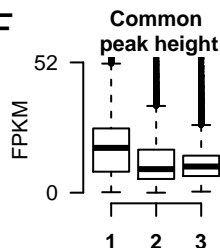

G

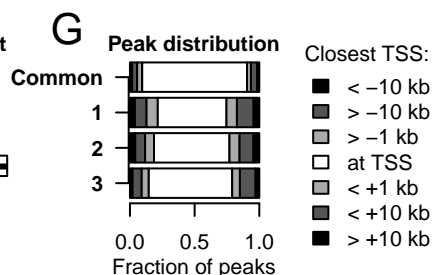

B

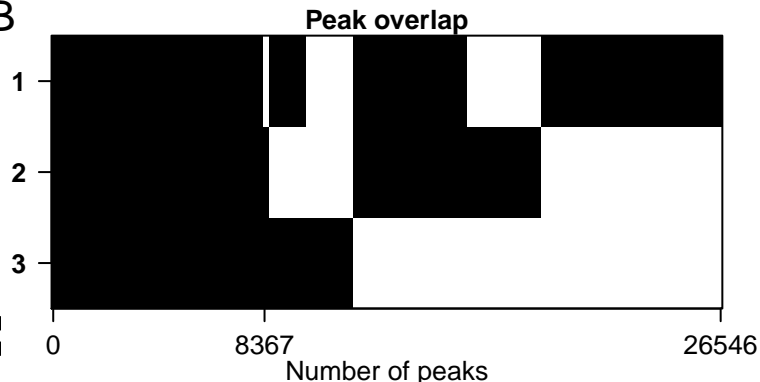



A

## HUVEC None Pol2 (dissimilar)

1 – HaibHuvecPol2Pcr1xUniPk  
2 – SydhHuvecPol2UniPk  
3 – UtaHuvecPol2UniPk

Peak detected ■  
No peak detected □

B

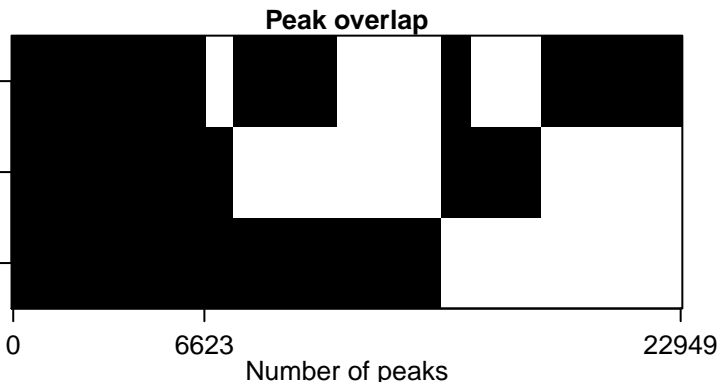

C

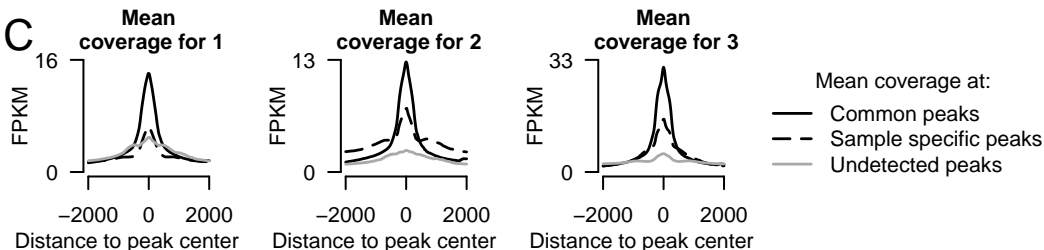

D

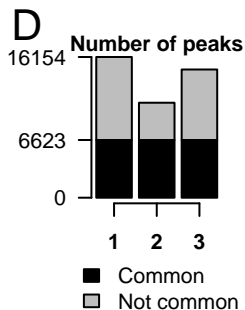

E

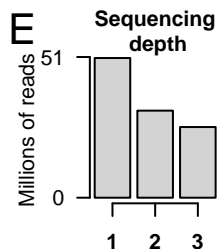

F

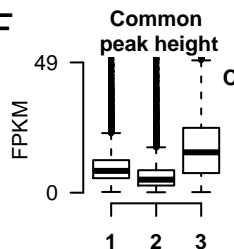

G

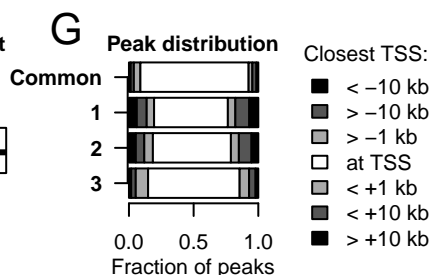

A

## K562 None Pol2 (dissimilar)

- 1 – HaibK562Pol2V0416101UniPk  
 2 – SydhK562Pol2IggmusUniPk  
 3 – SydhK562Pol2UniPk  
 4 – UtaK562Pol2UniPk

Peak detected ■  
 No peak detected □

C

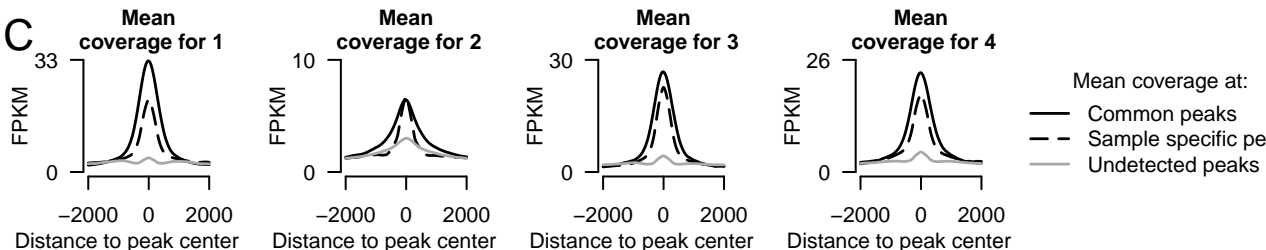

D

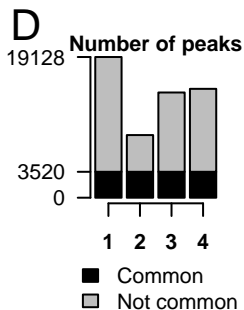

E

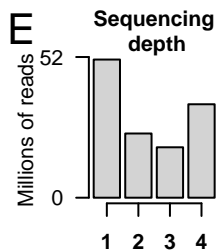

F

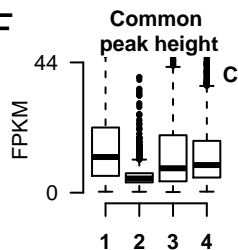

G

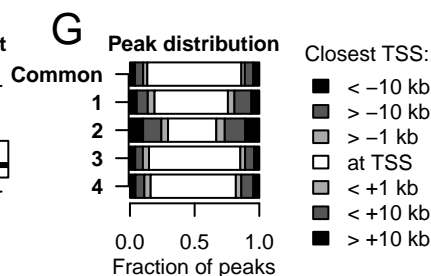

B

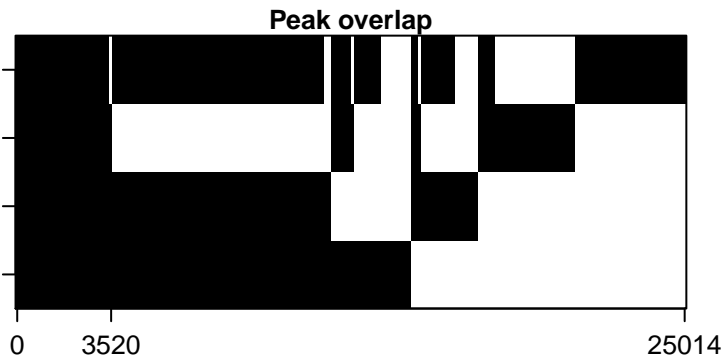

A

## GM12878 None Rad21 (similar)

1 – HaibGm12878Rad21V0416101UniPk  
2 – SydhGm12878Rad21lggrabUniPk

Peak detected ■  
No peak detected □

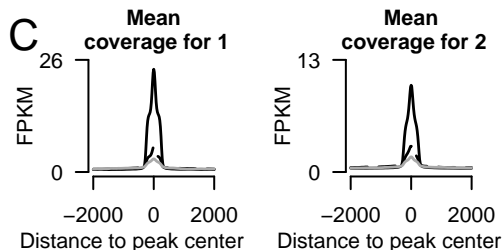

## D

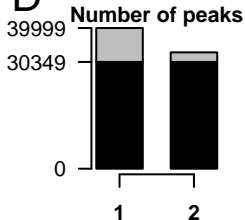

■ Common  
□ Not common

## E

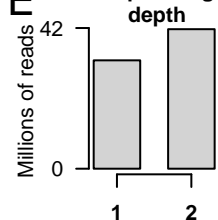

B

## Peak overlap

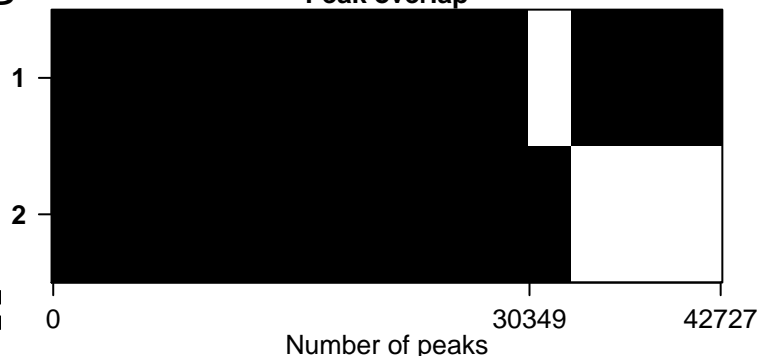

D



■ Common  
□ Not common

## F

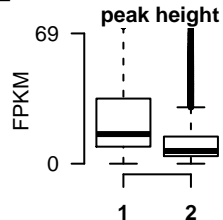

G

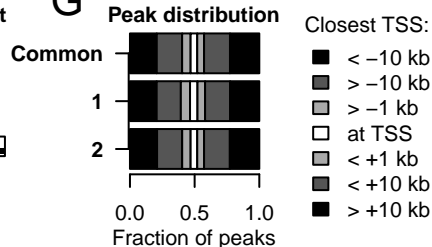

# A H1-hESC None Rad21 (similar)

1 – HaibH1hesRad21V0416102UniPk  
2 – SydhH1hesRad21lggrabUniPk

Peak detected ■  
No peak detected □

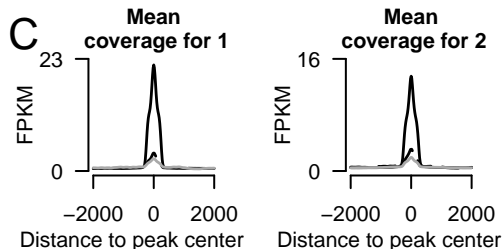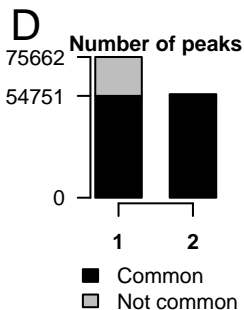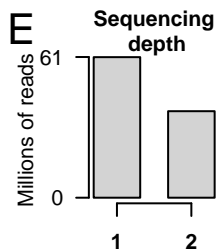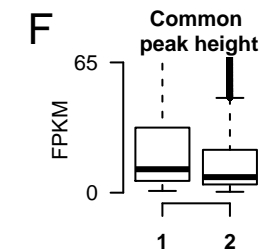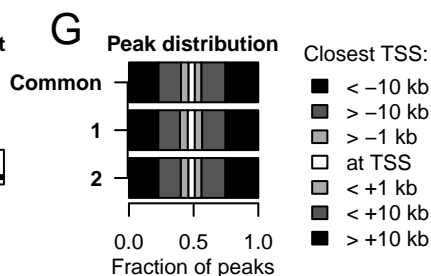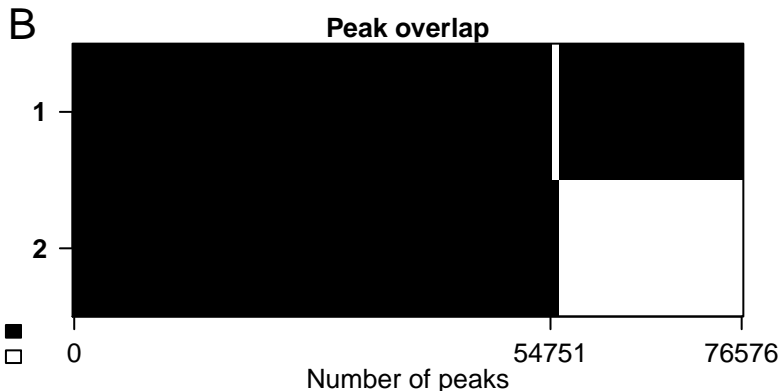

Supplementary figure 52: H1-hESC None Rad21 (similar)

A

## HepG2 None Rad21 (similar)

1 – HaibHepg2Rad21V0416101UniPk  
2 – SydhHepg2Rad21lggrabUniPk

Peak detected ■  
No peak detected □

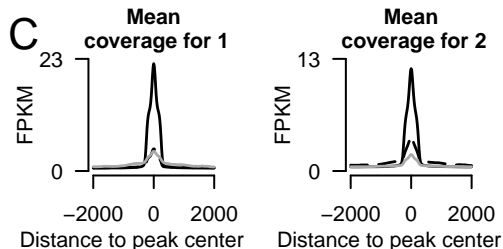

**D** Number of peaks

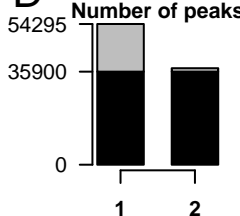

■ Common  
□ Not common

**E** Sequencing depth

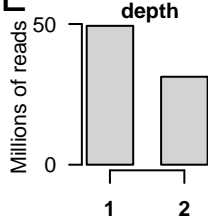

B

Peak overlap

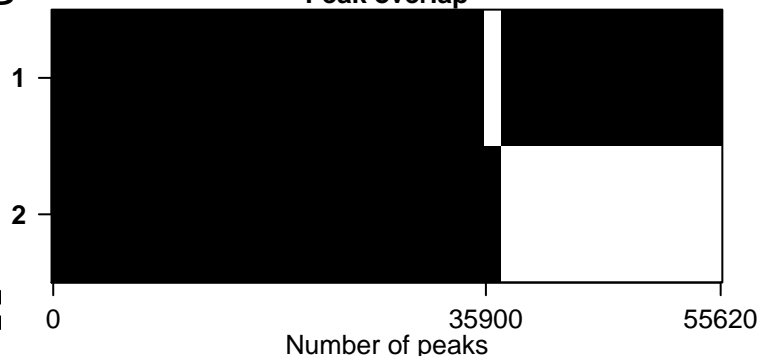

**F** Common peak height

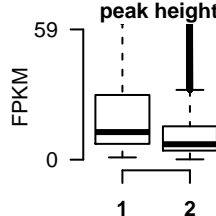

G

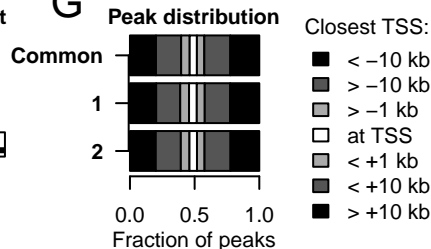

A

## K562 None Rad21 (dissimilar)

1 – HaibK562Rad21V0416102UniPk  
2 – SydhK562Rad21UniPk

Peak detected   
No peak detected

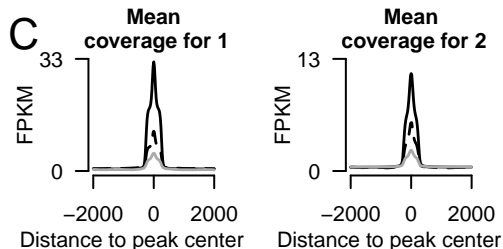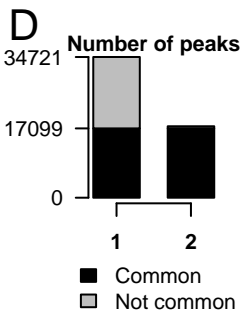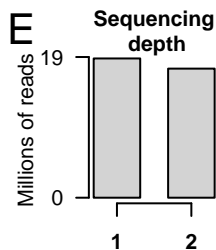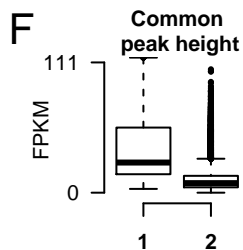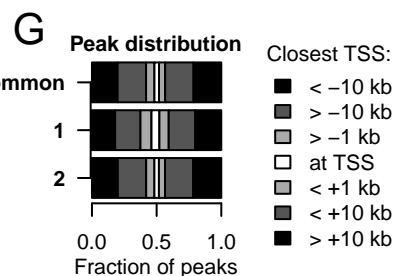

B

## Peak overlap

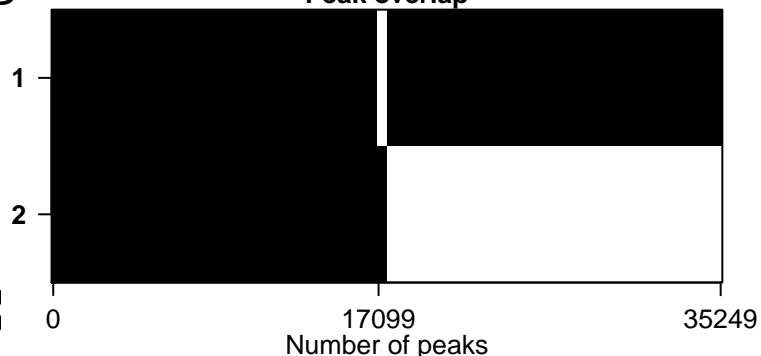

# A H1-hESC None SIN3A (sensitive)

1 - HaibH1hesSin3ak20Pcr1xUniPk  
2 - SydhH1hesSin3anb6001263lggrabUniPk

Peak detected ■  
No peak detected □

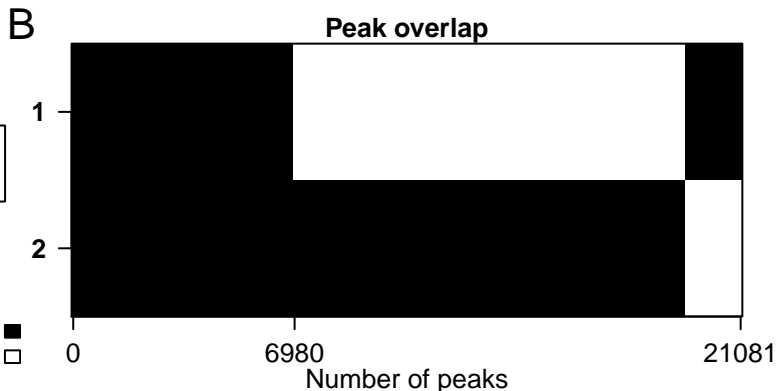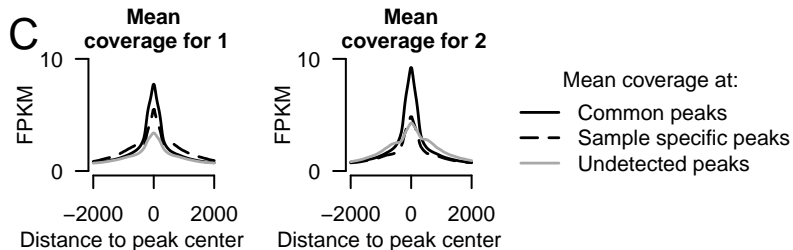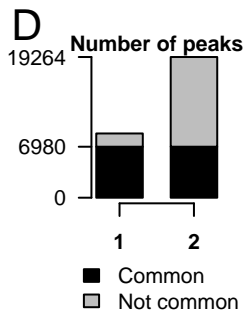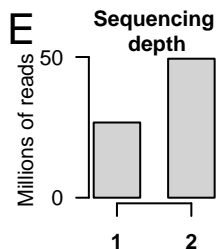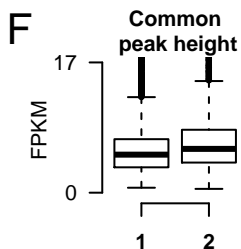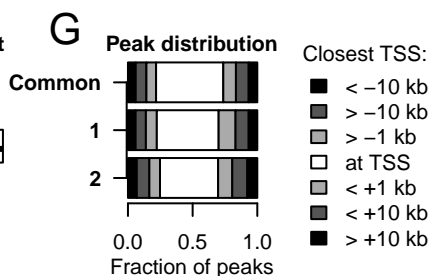

Supplementary figure 55: H1-hESC None SIN3A (sensitive)

**A**

# K562 None TBLR1 (dissimilar)

1 – SydhK562Tblr1ab24550lggrabUniPk  
2 – SydhK562Tblr1nb600270lggrabUniPk

Peak detected ■  
No peak detected □

**B**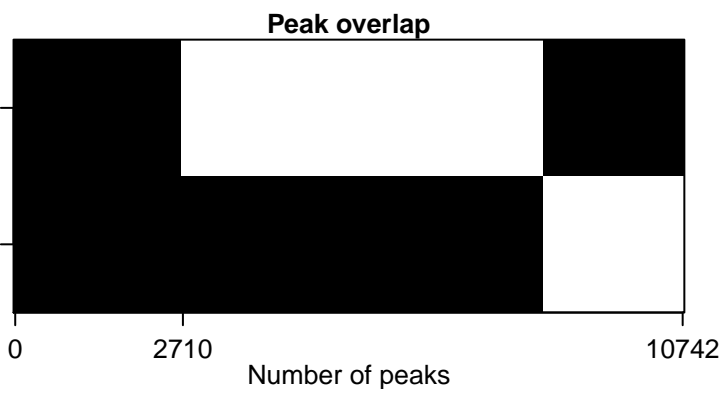**C**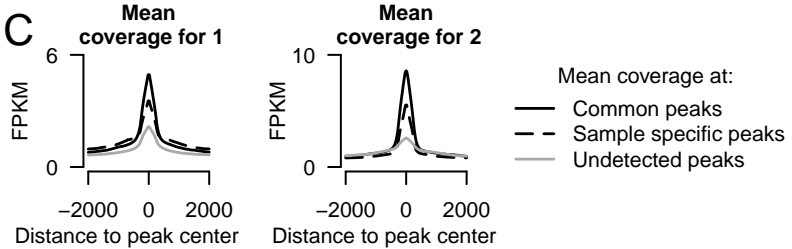**D**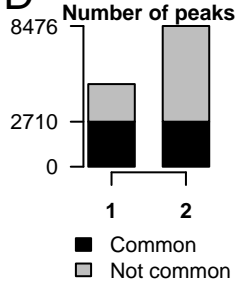**E**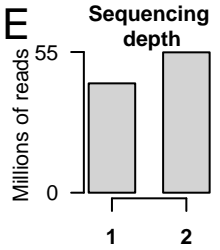**F**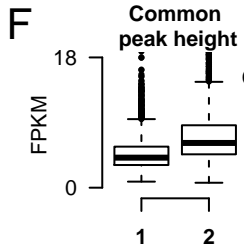**G**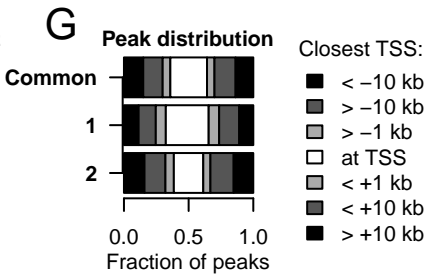

Supplementary figure 56: K562 None TBLR1 (dissimilar)



# A HeLa-S3 None TCF7L2 (sensitive)

1 – SydhHelas3Tcf7l2UcdUniPk  
2 – SydhHelas3Tcf7l2c9b92565UcdUniPk

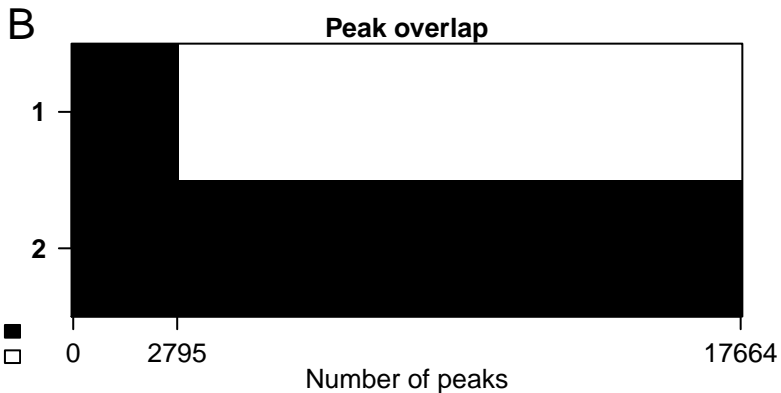

Peak detected ■  
No peak detected □

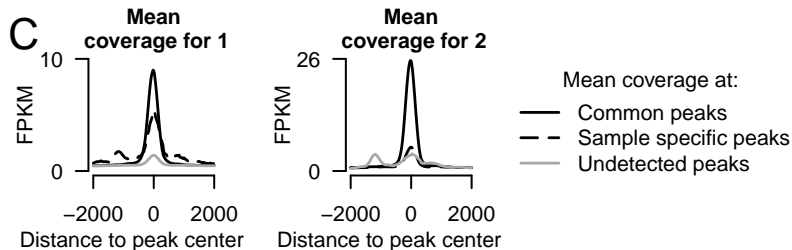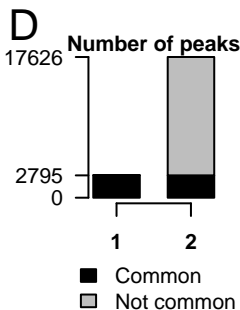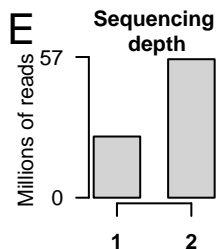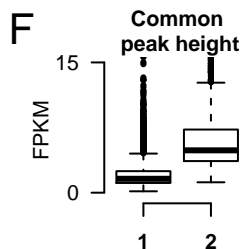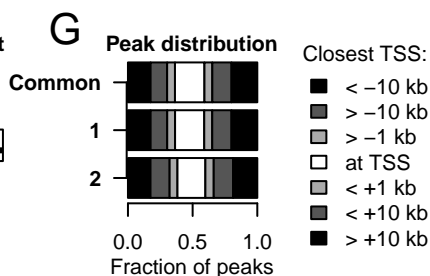

# A

## A549 EtOH 0.02pct USF1 (similar)

1 – HaibA549Usf1Pcr1xEtoh02UniPk  
 2 – HaibA549Usf1V0422111Etoh02UniPk

Peak detected ■  
 No peak detected □

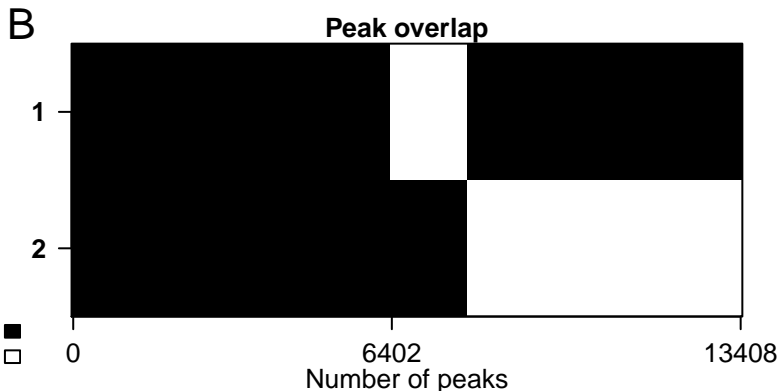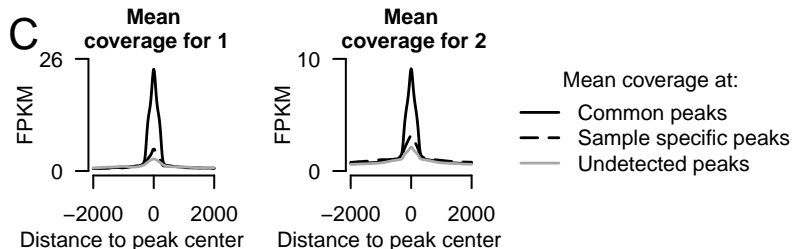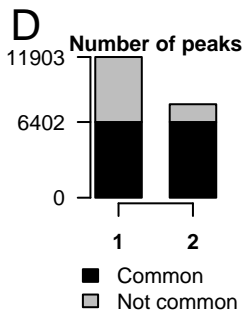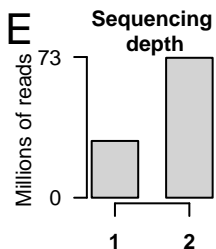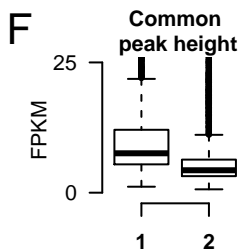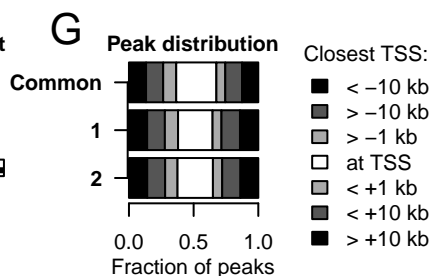

A

## GM12878 None YY1 (sensitive)

1 – HaibGm12878Yy1sc281Pcr1xUniPk  
2 – SydhGm12878Yy1UniPk

Peak detected ■  
No peak detected □

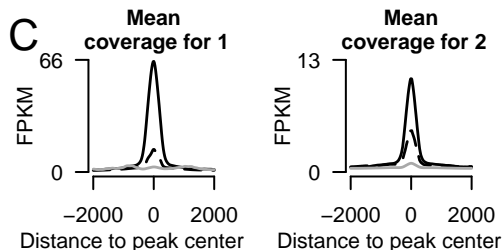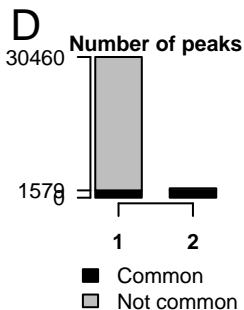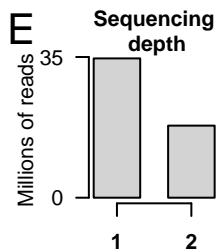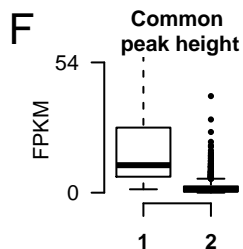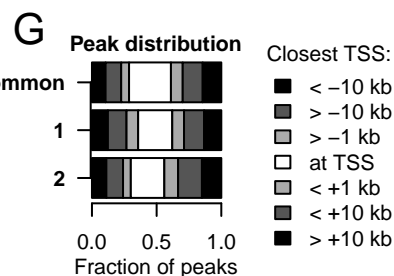

B

## Peak overlap

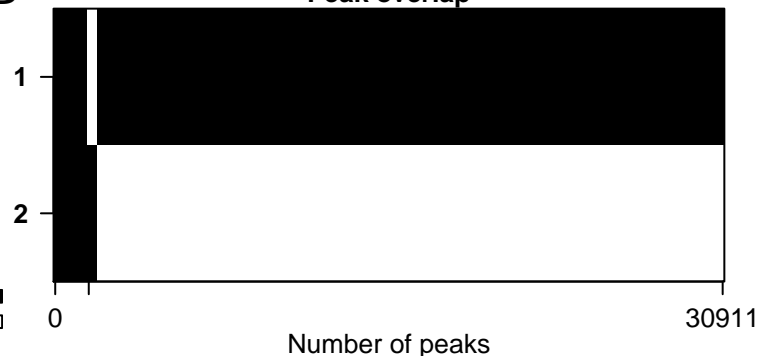

A

## K562 None YY1 (sensitive)

1 - HaibK562Yy1V0416101UniPk  
2 - HaibK562Yy1V0416102UniPk  
3 - SydhK562Yy1UcdUniPk

Peak detected ■  
No peak detected □

C

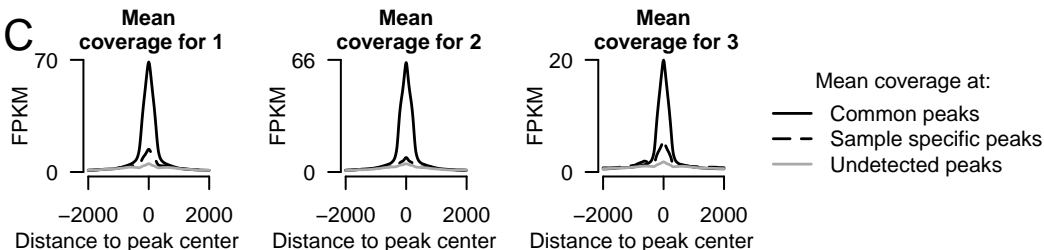

D

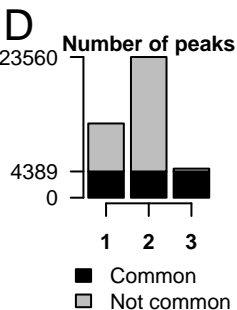

E

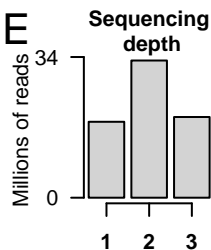

F

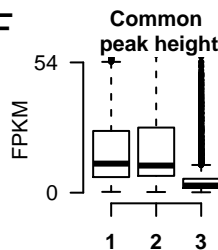

G

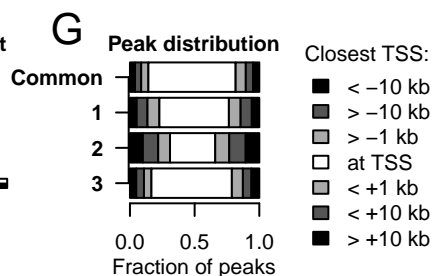

B

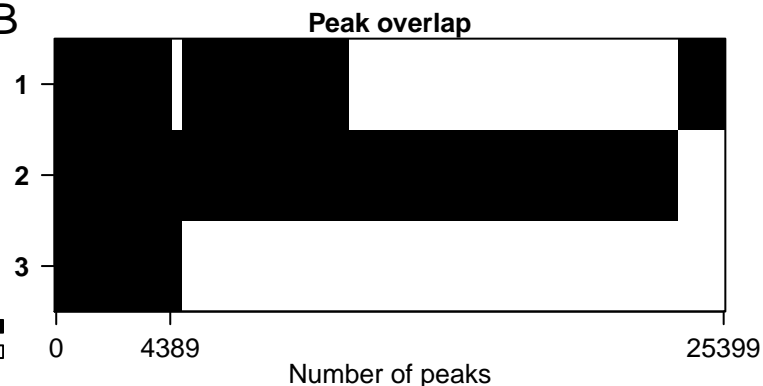

A

## K562 None ZNF274 (sensitive)

1 – SydhK562Znf274UcdUniPk  
2 – SydhK562Znf274m01UcdUniPk

Peak detected ■  
No peak detected □

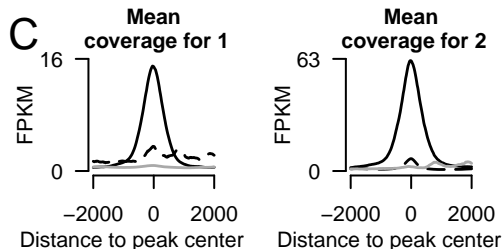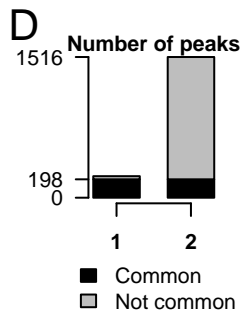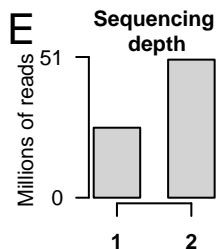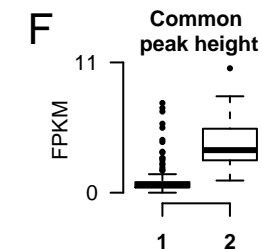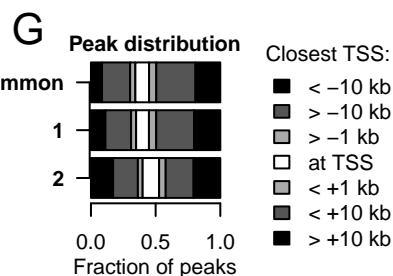

B

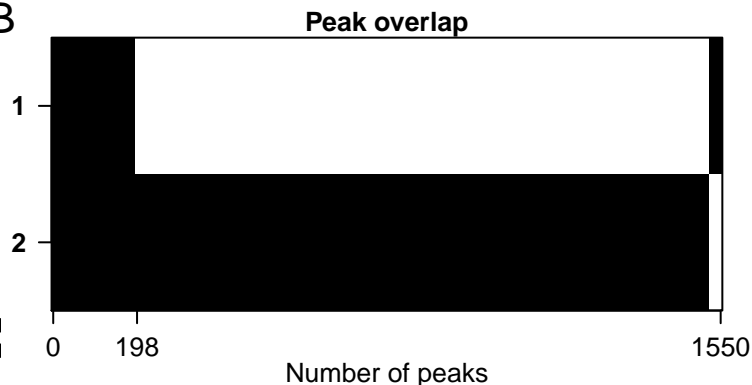

Supplement: mmc1.pdf [file mmc1.pdf]
